# Supplementary material for: Cross‐scale regulation of seasonal microclimate by vegetation and snow in the Arctic tundra
Source: PubMed Central journal article supplement (PMC9826065; doi:10.1111/gcb.16426), 2022-09-24
Supplement: GCB-28-7296-s001.pdf [file GCB-28-7296-s001.pdf]

# Cross-scale regulation of seasonal microclimate by vegetation and snow in the Arctic tundra

von Oppen J. et al. 2022 *Global Change Biology*

## ***Supplementary note***

### *Stratified random placement of sample plots*

For placement of scattered plots, we first computed one random candidate location for each of the six classes (three vegetation x two moisture classes; Table S1) within each elevation band on each mountainside. Depending on availability within a class, we additionally computed up to five alternative random locations for each of these plots, resulting in 60 candidate and ~300 alternative locations. Furthermore, we placed an additional 30 plots located in clustered “core-areas” on the eastern mountain slope to include high environmental variation within small spatial scales. Candidates for the core areas were selected from the list of all candidate sampling locations for the scattered plots (incl. alternatives) by choosing locations for which all six sampling classes of the landscape stratification were present within a 60 m radius around the location. Thereafter, we removed these core area locations from the lists of original locations - while maintaining their random order - and selected the first core area candidate as the prime candidate and the rest as alternatives. We then applied the random stratified sampling again, this time to generate an additional five locations within the 60 m radius around each potential core area centre by sampling the remaining five classes not covered by the centre location itself.

In the field, we established the sample plots based on the candidate locations where possible, working through the list of alternatives where lack of access, human disturbance (e.g. a path) or placement of the logger was not possible (see below for more details). We used handheld GPS devices (GARMIN eTrex 30, Garmin Ltd., Schaffhausen, Switzerland) to find plot locations with the predefined coordinates. Once the GPS reported arrival at the location, we placed a metal peg to mark the centre of the plot. In cases where placement of the peg and/or both loggers was not possible (e.g. due to shallow soil, solid rock, or standing water), we repeated the attempt

50 cm north, east, south and west of the original location. If necessary, further attempts were taken at 100, 150, and 200 cm in all cardinal directions. If placement was still not possible, we skipped the location and repeated the procedure at the next alternative location. In two cases, this resulted in placement of sample plots on the eastern instead of the western mountain slope, but in the same elevation band.

Hindsight assessment of vegetation cover across intended productivity classes confirmed that this part of the stratification was successful (Figure S10a). In contrast, comparison of local growing-season mean soil moisture across NDWI classes revealed that our study design did not systematically capture differences in water availability (Figure S10b). However, this mismatch could partly be due to between-year moisture variation, as the growing season of 2018 saw much more precipitation than the rather dry summer of 2019.

## Supplementary figures

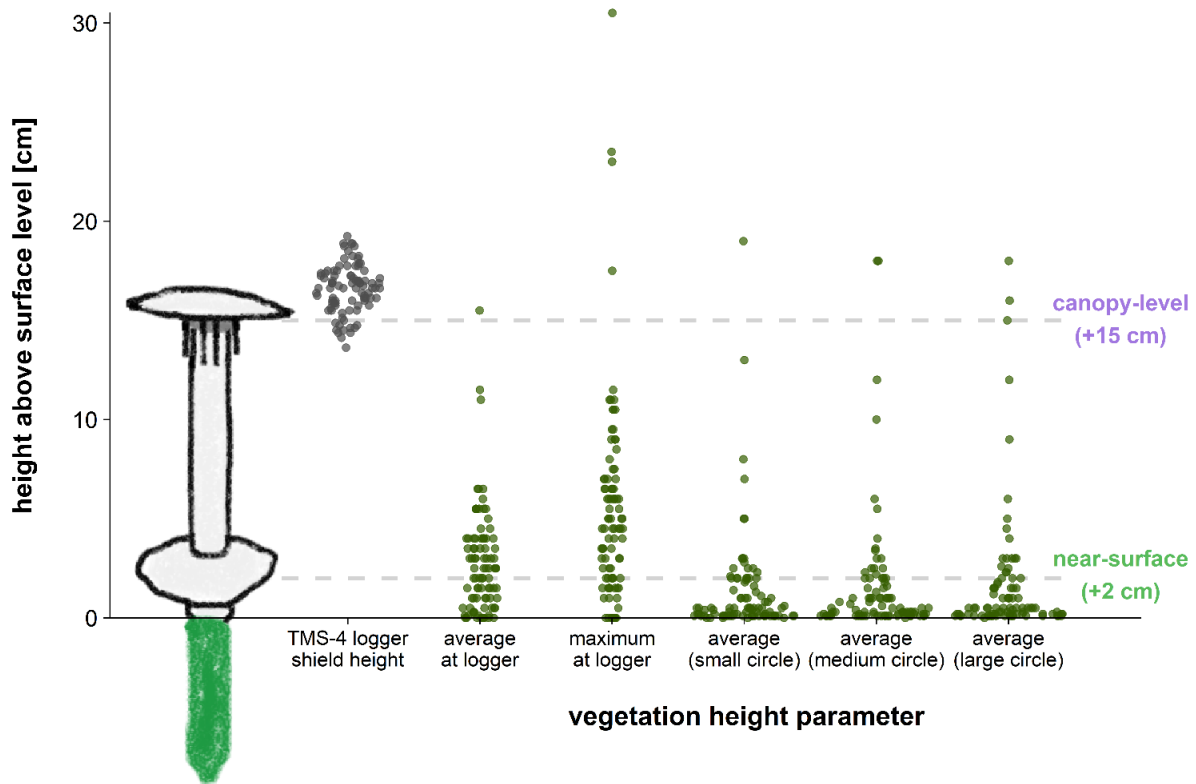

**Figure S1:**

**The top (= air) sensor of the microclimate logger reached above the vegetation in most plots.** Dots show the distributions of height measurements for the top shield of the TOMST TMS-4 logger and for vegetation at the logger as well as in each sampling circle (see Figure 1 in the main text). Dashed horizontal lines indicate position of the above-ground temperature sensors on the logger for reference.

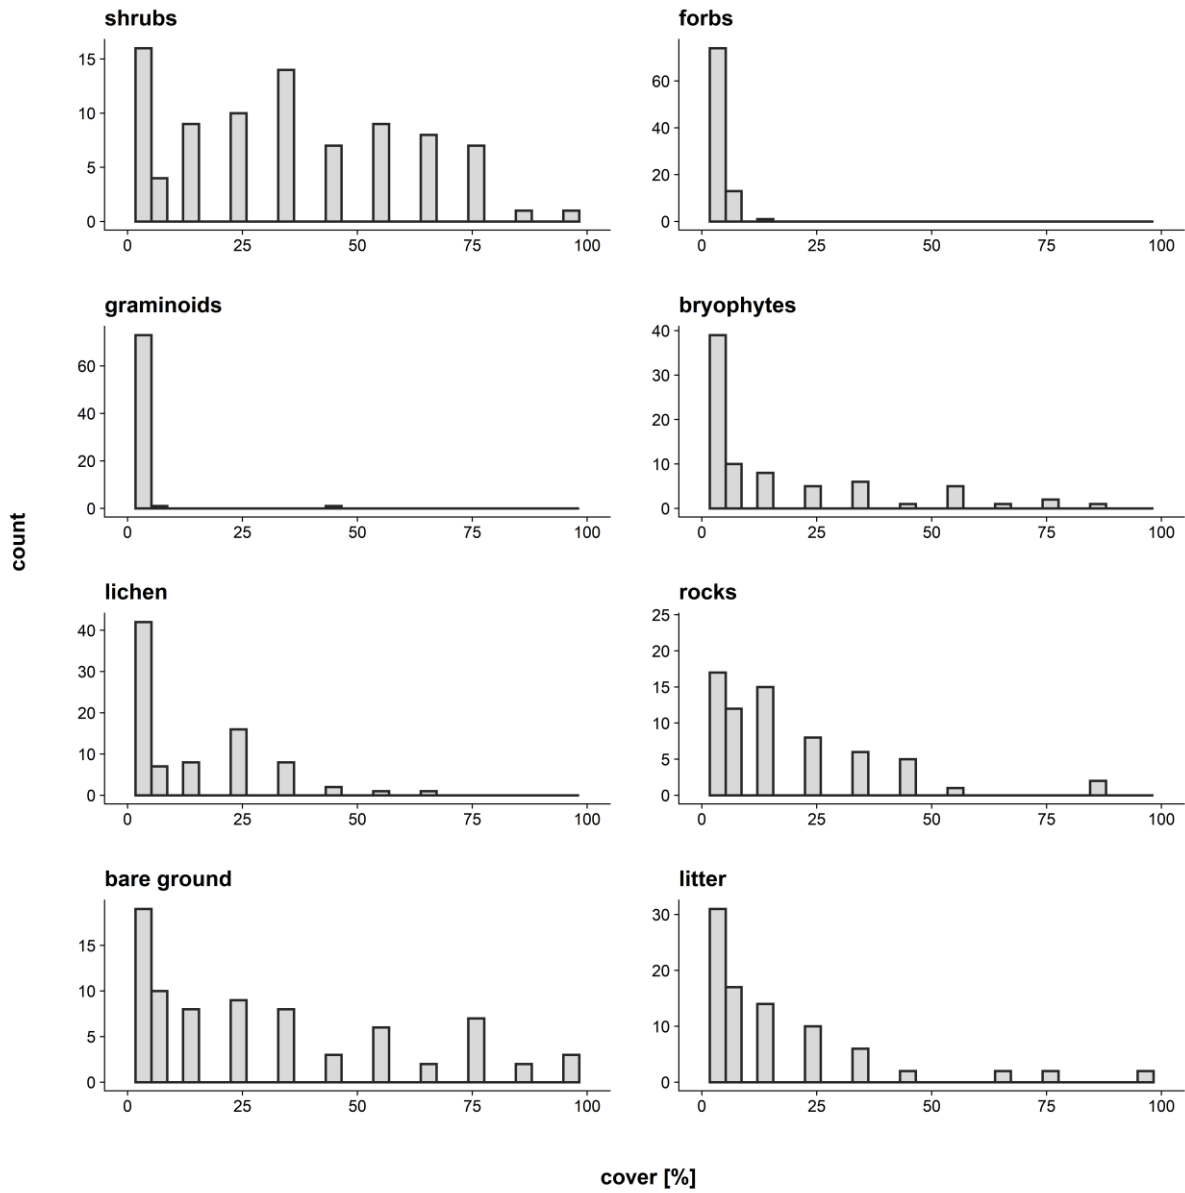

**Figure S2:**

Histograms of cover values for different categories in sample plots. Scarce forb and graminoid cover were excluded from analysis.

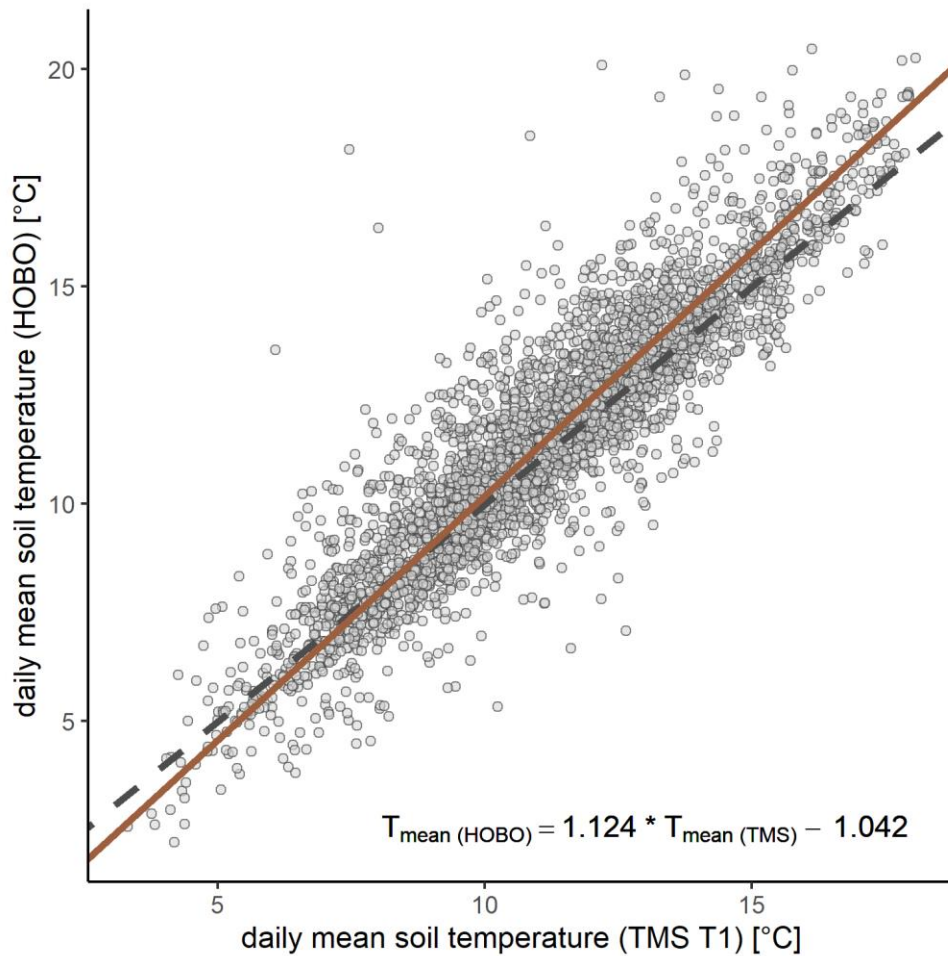

**Figure S3:**

**Growing-season soil temperature measurements were well aligned between TMS and HOBO sensors.**

Points represent measurement pairs of daily mean temperature. The brown line shows the fitted linear relationship (coefficients shown in equation), and the grey dashed line presents the 1:1 relationship for comparison.

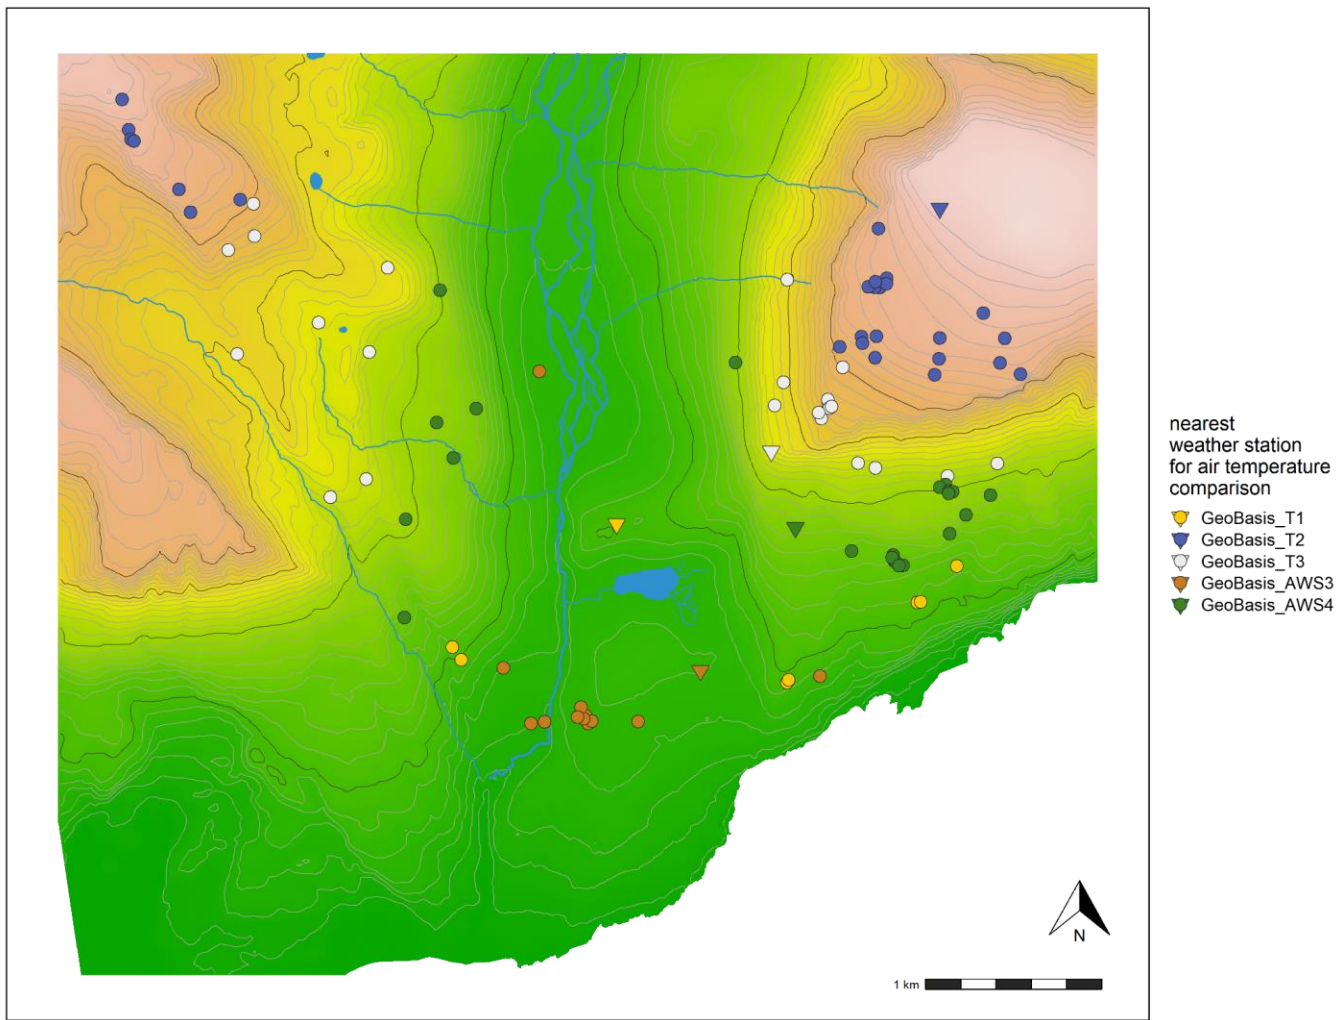

**Figure S4:**

Weather station with the smallest elevation difference to each sample plot, of which the free-air temperature time series was used to calculate temperature differences. See also Figure 1 in the main text for a description of plot placement.

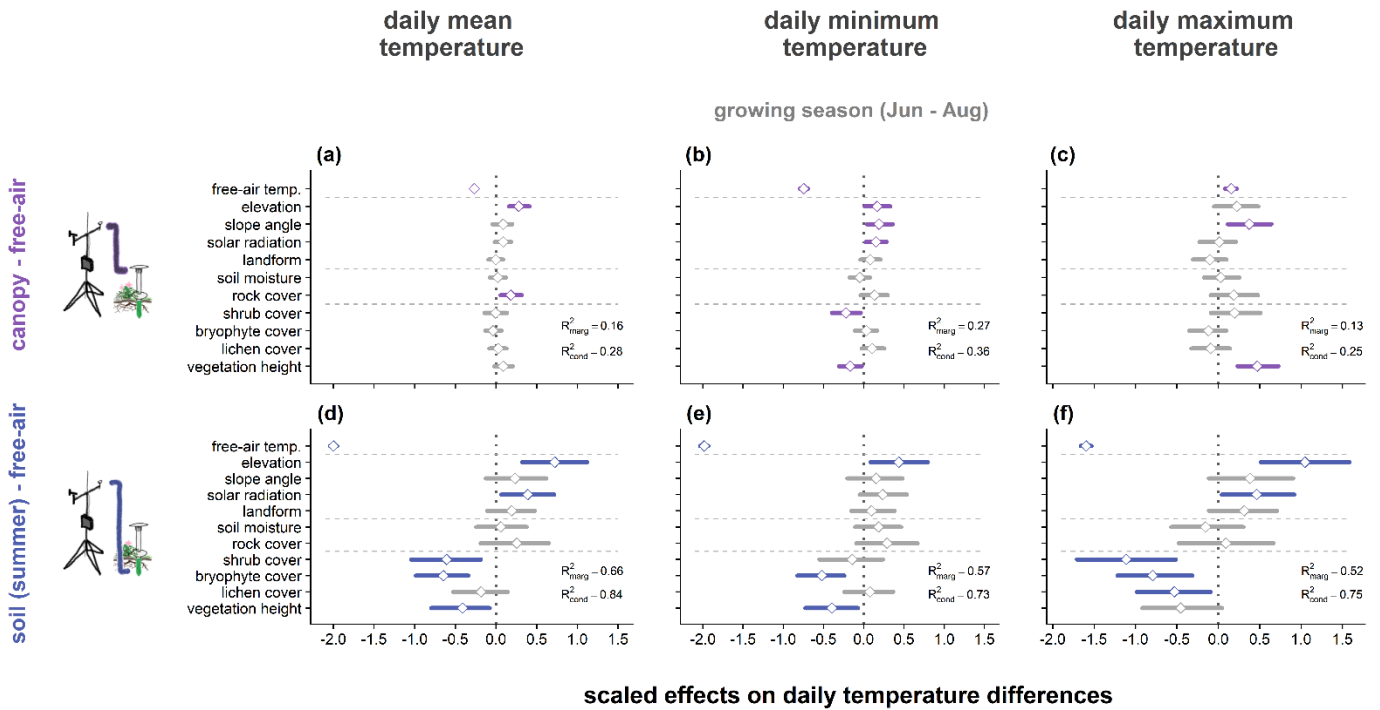

**Figure S5:**

Local factors weakly influenced differences between free-air weather stations and TMS canopy sensors (**a-c**), resulting in relationships of soil vs. free-air  $\Delta T$  with environmental variables largely consistent with those of soil vs. canopy-layer  $\Delta T$  (**d-f**; compare Figure 4a-c in main text). Exceptions include significant positive relationships of soil vs. free-air  $\Delta T_{\text{mean}}$  with elevation and solar radiation, as well as a non-significant relationship of soil vs. free-air  $\Delta T_{\text{max}}$  with more exposed landforms and vegetation height. These differences might be partly attributable to elevational and topographical mismatches between plot and weather station locations (see Figure S4).

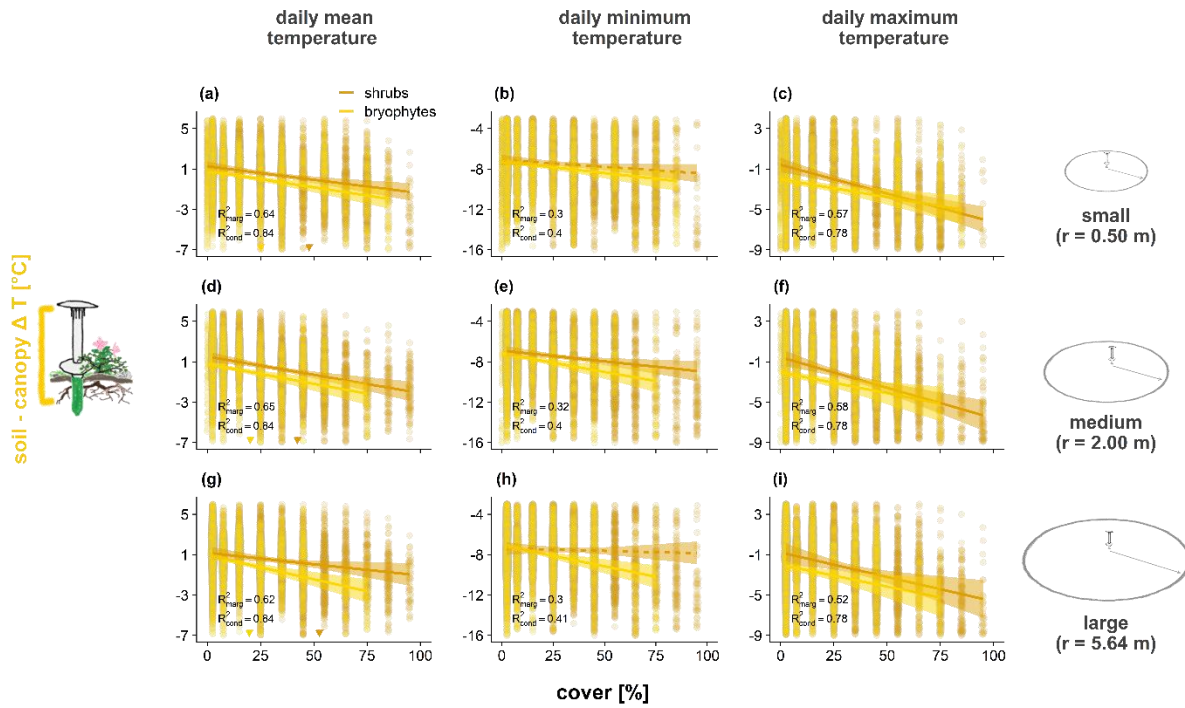

**Figure S6:**

**Growing season temperature differences between canopy level and soil shift from warmer to cooler soils with higher shrub and bryophyte cover. The relationships were consistent across plot sizes, as vegetation cover measures were highly correlated across plot sizes (Table S7). This figure is identical to Figure 5 in the main text, but also shows the data points for daily temperature variables for each plot.**



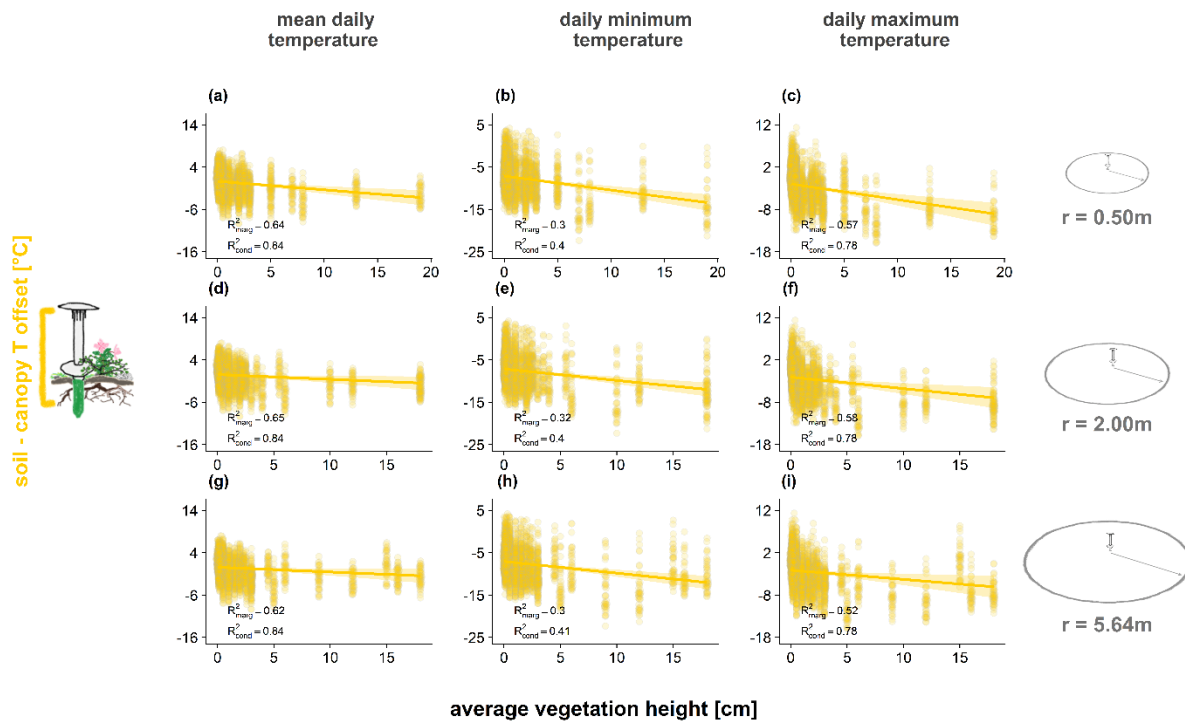

**Figure S7:**

**Growing season temperature differences between canopy level and soil increase with taller vegetation.**

**As height values were highly correlated (Table S7), this relationship was consistent across plot sizes.**

The panels show predicted relationships (solid green lines with light-green 95% credible intervals) between the average vegetation height within a plot and the observed difference between soil and canopy-level temperatures for the daily mean, minimum and maximum temperatures over the 2019 growing season. We measured the average vegetation height for three different sizes of circles around the centre of the plots; these circles had radii of **(a-c)** 0.5 m, **(d-f)** 2 m and **(g-i)** 5.64 m. Note that loggers and circle sizes on the right are not to scale.

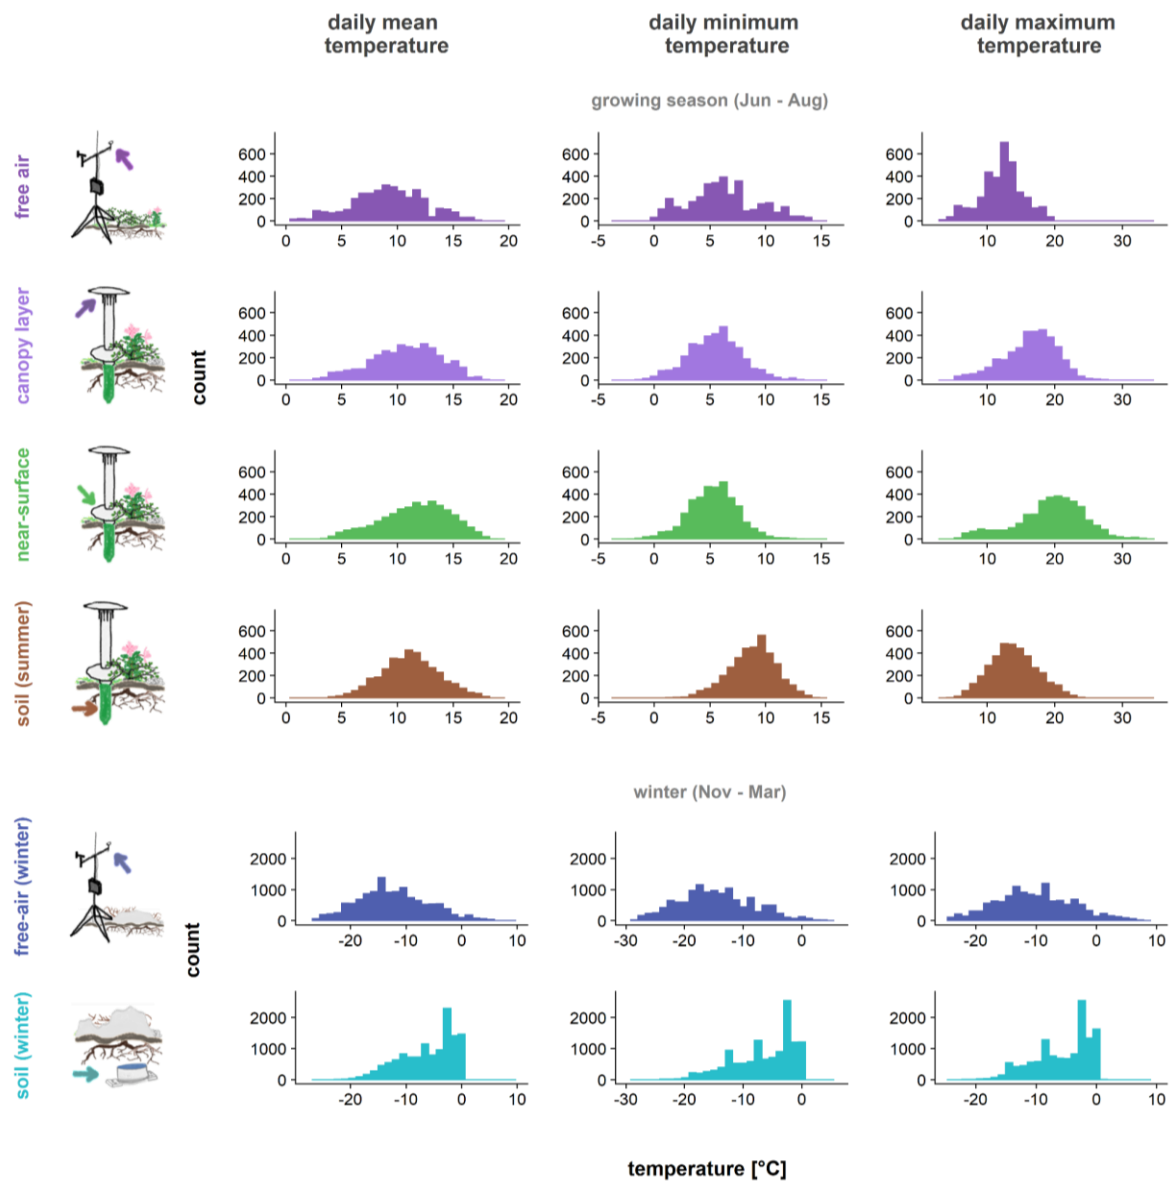

**Figure S8:**

Histograms of seasonal mean temperatures across the vegetation profile, per plot or weather station. Narrow distribution in weather station values is due to the low number of stations present and only a subset of these being highly correlated with air or soil temperatures in the plots (Figure S4).

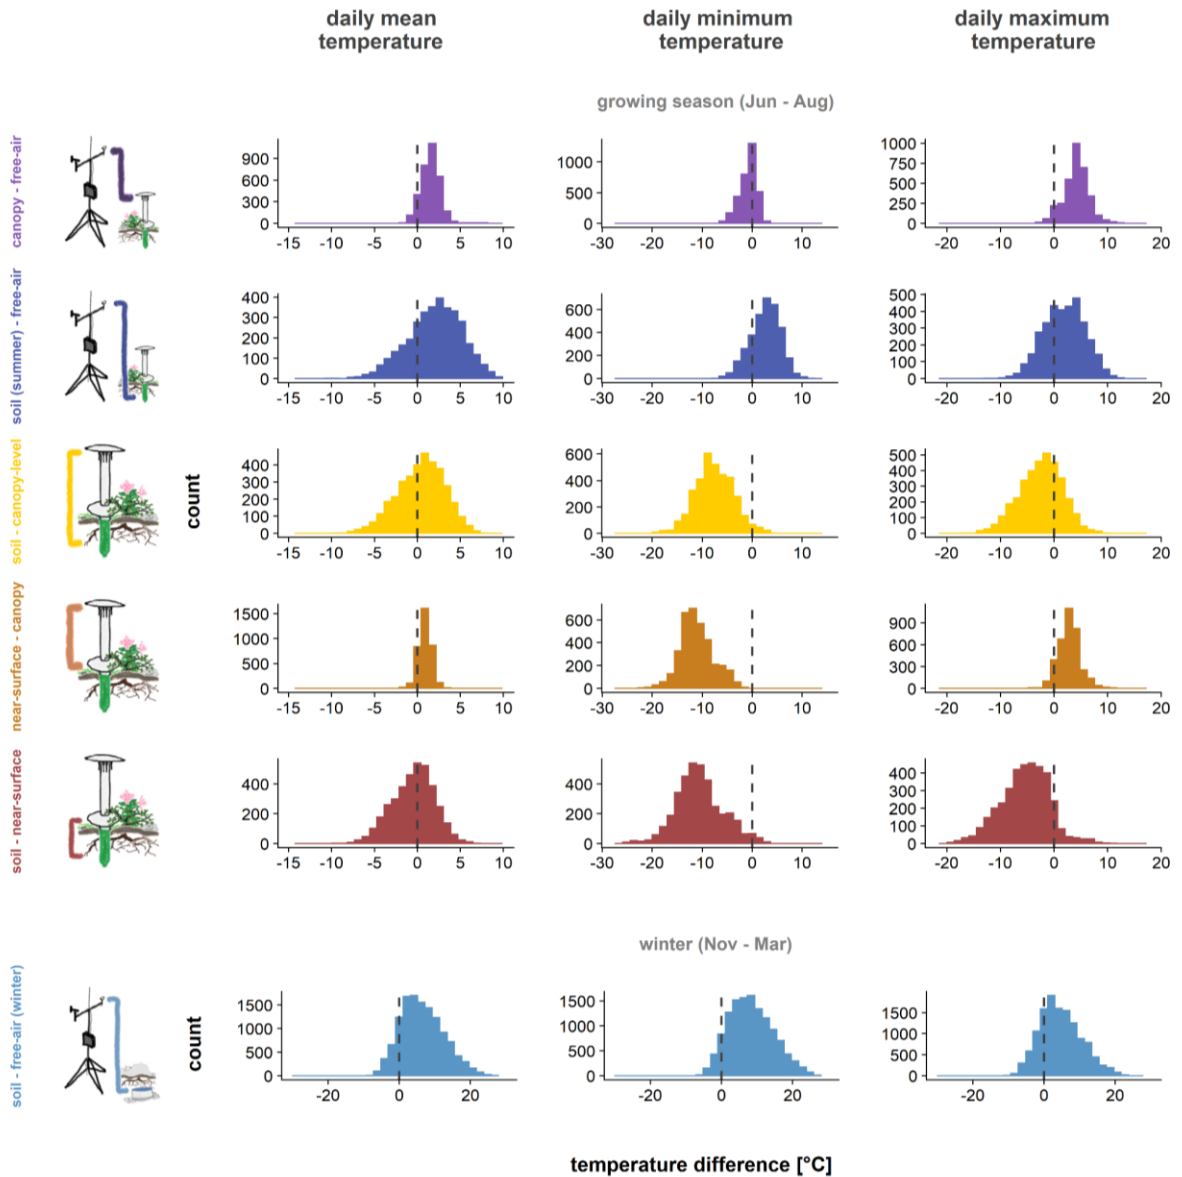

**Figure S9:**

Histograms of differences between daily mean, minimum and maximum temperatures in different layers of the vegetation profile. Negative values point to colder lower layers compared to higher elevated ones, while positive values indicate higher temperatures in lower layers. Note that vertical axis ranges vary between panels.

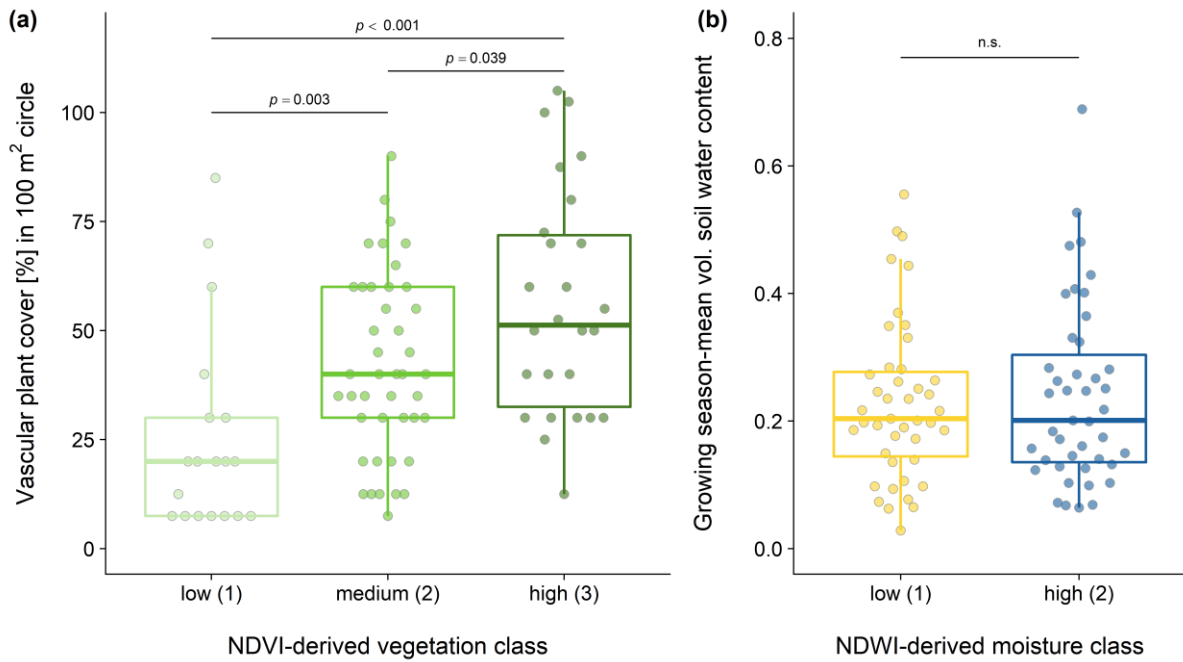

**Figure S10:**

**The stratified-random sampling design succeeded to capture different vegetation cover, but not moisture conditions. (a)** Cover values represent summed cover of shrubs, graminoids and forbs and could exceed 100 % in case of overlapping vegetation layers. **(b)** Soil moisture values were scaled across the range of daily mean values. P values were obtained from a Kruskal-Wallis test ( $\chi^2 = 17.78$ ,  $df = 2$ ) with post-hoc correction.

## Supplementary tables

**Table S1:** Threshold values for the definition of vegetation and moisture classes. For vegetation classes, values are based on Normalised Difference Vegetation Index (NDVI), for moisture classes, values are based on Normalised Difference Wetness Index (NDWI). The thresholds were determined based on the distribution of values across the study area using k-means clustering.

| Vegetation | NDVI       | Moisture | NDWI       |
|------------|------------|----------|------------|
| Low        | > -0.21477 | Low      | > -0.38214 |
|            |            |          | < -0.02306 |
|            | < 0.17910  | High     | > -0.02306 |
|            |            |          | < 0.49108  |
| Medium     | > 0.17910  | Low      | > -0.36011 |
|            |            |          | < -0.02776 |
|            | < 0.40434  | High     | > -0.02776 |
|            |            |          | < 0.49430  |
| High       | > 0.40434  | Low      | > -0.23849 |
|            |            |          | < 0.09586  |
|            | < 0.84541  | High     | > 0.09587  |
|            |            |          | < 0.53435  |

**Table S2:** Pearson correlation coefficients for growing-season mean temperatures and growing degree days (GDD) for canopy-level, near-surface and soil sensors, and for winter (November - March) mean temperatures and freezing degree days (FDD) in the soil. GDD were calculated as the sum of daily mean temperatures above 0 (GDD0) and 5 °C (GDD5), respectively.

|                                  |        | canopy-level<br>(growing season) |      |      | near-surface<br>(growing season) |      |      | soil<br>(growing season) |      |      | soil<br>(Nov - Mar) |       |
|----------------------------------|--------|----------------------------------|------|------|----------------------------------|------|------|--------------------------|------|------|---------------------|-------|
|                                  |        | mean T                           | GDD0 | GDD5 | mean T                           | GDD0 | GDD5 | mean T                   | GDD0 | GDD5 | mean T              | FDD   |
| canopy-level<br>(growing season) | mean T | --                               | 0.71 | 0.71 |                                  |      |      |                          |      |      |                     |       |
|                                  | GDD0   | 0.71                             | --   | 1.00 |                                  |      |      |                          |      |      |                     |       |
|                                  | GDD5   | 0.71                             | 1.00 | --   |                                  |      |      |                          |      |      |                     |       |
| near-surface<br>(growing season) | mean T |                                  |      |      | --                               | 0.73 | 0.73 |                          |      |      |                     |       |
|                                  | GDD0   |                                  |      |      | 0.73                             | --   | 1.00 |                          |      |      |                     |       |
|                                  | GDD5   |                                  |      |      | 0.73                             | 1.00 | --   |                          |      |      |                     |       |
| soil<br>(growing season)         | mean T |                                  |      |      |                                  |      |      | --                       | 0.93 | 0.93 |                     |       |
|                                  | GDD0   |                                  |      |      |                                  |      |      | 0.93                     | --   | 1.00 |                     |       |
|                                  | GDD5   |                                  |      |      |                                  |      |      | 0.93                     | 1.00 | --   |                     |       |
| soil<br>(Nov - Mar)              | mean T |                                  |      |      |                                  |      |      |                          |      |      | --                  | -1.00 |
|                                  | FDD    |                                  |      |      |                                  |      |      |                          |      |      | -1.00               | --    |

**Table S3:** Pearson correlation coefficients for differences between growing-season mean temperatures and growing degree days (GDD) across vegetation layers, respectively, and between winter (November - March) mean temperatures and freezing degree days (FDD) in the soil and free air. GDD were calculated as the sum of daily mean temperatures above 0 (GDD0) and 5 °C (GDD5), respectively.

|                                                  |        | canopy-level - free-air<br>(growing season) |      |      | soil - free-air<br>(growing season) |      |      | soil - canopy-level<br>(growing season) |      |      | near-surface - canopy-level<br>(growing season) |      |      | soil - near-surface<br>(growing season) |      |      | soil - free-air<br>(Nov - Mar) |       |
|--------------------------------------------------|--------|---------------------------------------------|------|------|-------------------------------------|------|------|-----------------------------------------|------|------|-------------------------------------------------|------|------|-----------------------------------------|------|------|--------------------------------|-------|
|                                                  |        | mean T                                      | GDD0 | GDD5 | mean T                              | GDD0 | GDD5 | mean T                                  | GDD0 | GDD5 | mean T                                          | GDD0 | GDD5 | mean T                                  | GDD0 | GDD5 | mean T                         | FDD   |
| canopy-level - free-air<br>(growing season)      | mean T | --                                          | 0.99 | 0.97 |                                     |      |      |                                         |      |      |                                                 |      |      |                                         |      |      |                                |       |
|                                                  | GDD0   | 0.99                                        | --   | 0.99 |                                     |      |      |                                         |      |      |                                                 |      |      |                                         |      |      |                                |       |
|                                                  | GDD5   | 0.97                                        | 0.99 | --   |                                     |      |      |                                         |      |      |                                                 |      |      |                                         |      |      |                                |       |
| soil - free-air<br>(growing season)              | mean T |                                             |      |      | --                                  | 0.99 | 0.99 |                                         |      |      |                                                 |      |      |                                         |      |      |                                |       |
|                                                  | GDD0   |                                             |      |      | 0.99                                | --   | 1.00 |                                         |      |      |                                                 |      |      |                                         |      |      |                                |       |
|                                                  | GDD5   |                                             |      |      | 0.99                                | 1.00 | --   |                                         |      |      |                                                 |      |      |                                         |      |      |                                |       |
| soil - canopy-level<br>(growing season)          | mean T |                                             |      |      |                                     |      |      | --                                      | 1.00 | 0.99 |                                                 |      |      |                                         |      |      |                                |       |
|                                                  | GDD0   |                                             |      |      |                                     |      |      | 1.00                                    | --   | 1.00 |                                                 |      |      |                                         |      |      |                                |       |
|                                                  | GDD5   |                                             |      |      |                                     |      |      | 0.99                                    | 1.00 | --   |                                                 |      |      |                                         |      |      |                                |       |
| near-surface - canopy-<br>level (growing season) | mean T |                                             |      |      |                                     |      |      |                                         |      |      | --                                              | 0.99 | 0.98 |                                         |      |      |                                |       |
|                                                  | GDD0   |                                             |      |      |                                     |      |      |                                         |      |      | 0.99                                            | --   | 0.98 |                                         |      |      |                                |       |
|                                                  | GDD5   |                                             |      |      |                                     |      |      |                                         |      |      | 0.98                                            | 0.98 | --   |                                         |      |      |                                |       |
| soil - near-surface<br>(growing season)          | mean T |                                             |      |      |                                     |      |      |                                         |      |      |                                                 |      |      | --                                      | 1.00 | 0.99 |                                |       |
|                                                  | GDD0   |                                             |      |      |                                     |      |      |                                         |      |      |                                                 |      |      | 1.00                                    | --   | 1.00 |                                |       |
|                                                  | GDD5   |                                             |      |      |                                     |      |      |                                         |      |      |                                                 |      |      | 0.99                                    | 1.00 | --   |                                |       |
| soil - free-air<br>(Nov - Mar)                   | mean T |                                             |      |      |                                     |      |      |                                         |      |      |                                                 |      |      |                                         |      |      | --                             | -1.00 |
|                                                  | FDD    |                                             |      |      |                                     |      |      |                                         |      |      |                                                 |      |      |                                         |      |      | -1.00                          | --    |



**Table S4:** Predictor variables included in the different models of temperature responses across both seasons. Groups include temperature / temperature difference responses across all vegetation layers. Cover variables were included at their respective sampling resolution (plot radius 0.50, 2.00 or 5.64 m) into cross-scale models of growing-season temperature differences. See Table S5 for other predictors removed to avoid collinearity.

| Temperature response group                                    | Model formula                                                                                                                                                                                                                    |
|---------------------------------------------------------------|----------------------------------------------------------------------------------------------------------------------------------------------------------------------------------------------------------------------------------|
| Growing-season daily [mean/min/max] temperature               | temperature ~ daily free-air temperature + elevation + slope angle + solar radiation + landform + soil moisture + rock cover + shrub cover + bryophyte cover + lichen cover + average vegetation height + (1 plot ID)            |
| Growing-season daily difference in [mean/min/max] temperature | temperature difference ~ daily free-air temperature + elevation + slope angle + solar radiation + landform + soil moisture + rock cover + shrub cover + bryophyte cover + lichen cover + average vegetation height + (1 plot ID) |
| Winter daily [mean/min/max] temperature                       | temperature ~ daily free-air temperature + elevation + slope angle + solar radiation + landform + snow cover duration + rock cover + shrub cover + average vegetation height + (1 plot ID)                                       |
| Winter daily difference in [mean/min/max] temperature         | temperature difference ~ daily free-air temperature + elevation + slope angle + solar radiation + landform + snow cover duration + rock cover + shrub cover + average vegetation height + (1 plot ID)                            |

**Table S5:** Pearson correlation coefficients between all potential predictor variables for the small circles (radius 0.5 m). Either growing-season solar radiation, soil moisture, bryophyte and lichen cover (\*, growing season) or snow cover duration and winter solar radiation (#, winter) were included as season-specific predictors (see also Table S4 for predictors included into each model). Shaded variables were removed prior to analyses to avoid collinearity with remaining variables. For clarity, only correlations with  $|r| > 0.3$  are shown.

|                                         | elevation | slope inclination | solar rad. (SRI, growing season) | solar rad. (SRI, Nov – Mar) | landform | soil moisture | snow cover duration | rock cover | bare ground cover | shrub cover | bryophyte cover | lichen cover | litter cover | average vegetation height | average veg. height at logger | TMS top shield cover | TMS bottom shield cover | ground cover at logger |
|-----------------------------------------|-----------|-------------------|----------------------------------|-----------------------------|----------|---------------|---------------------|------------|-------------------|-------------|-----------------|--------------|--------------|---------------------------|-------------------------------|----------------------|-------------------------|------------------------|
| elevation                               | --        |                   |                                  |                             |          |               |                     | 0.49       |                   | -0.44       | -0.32           | -0.30        |              |                           | -0.42                         |                      |                         |                        |
| slope inclination                       |           | --                | -0.35                            | -0.85                       |          | -0.3          |                     |            |                   | 0.31        | -0.38           |              | 0.30         |                           |                               |                      |                         |                        |
| solar radiation (SRI, growing season) * |           | -0.35             | --                               |                             |          |               |                     |            |                   |             |                 |              |              |                           |                               |                      |                         |                        |
| solar radiation (SRI, winter) #         |           | -0.85             |                                  | --                          |          |               |                     |            |                   |             | 0.35            |              | -0.34        |                           |                               |                      |                         |                        |
| landform                                |           |                   |                                  |                             | --       |               |                     |            |                   |             |                 |              |              |                           |                               |                      |                         |                        |
| soil moisture                           |           | -0.30             |                                  |                             |          | --            |                     |            |                   |             |                 |              |              |                           |                               |                      |                         |                        |
| snow cover duration #                   |           |                   |                                  |                             |          |               | --                  |            | -0.32             |             |                 |              |              |                           |                               |                      |                         |                        |
| rock cover                              | 0.49      |                   |                                  |                             |          |               |                     | --         |                   | -0.42       |                 |              |              |                           |                               |                      |                         |                        |
| bare ground cover                       |           |                   |                                  |                             |          |               | -0.32               |            | --                | -0.71       |                 |              | -0.43        | -0.34                     | -0.43                         | -0.41                | -0.48                   |                        |
| shrub cover                             | -0.44     | 0.31              |                                  |                             |          |               |                     | -0.42      | -0.71             | --          |                 |              | 0.63         | 0.50                      | 0.57                          | 0.53                 | 0.64                    |                        |
| bryophyte cover *                       |           | -0.38             |                                  | 0.35                        |          |               |                     |            |                   |             | --              |              |              |                           |                               |                      |                         |                        |
| lichen cover *                          | -0.32     |                   |                                  |                             |          |               |                     |            |                   |             |                 | --           |              |                           |                               |                      |                         |                        |
| litter cover                            | -0.30     | 0.30              |                                  | -0.34                       |          |               |                     |            | -0.43             | 0.63        |                 |              | --           | 0.57                      | 0.56                          | 0.32                 | 0.58                    | 0.39                   |
| average vegetation height               |           |                   |                                  |                             |          |               |                     |            | -0.34             | 0.50        |                 |              | 0.57         | --                        | 0.81                          | 0.82                 | 0.75                    | 0.38                   |
| average veg. height at logger           | -0.42     |                   |                                  |                             |          |               |                     |            | -0.43             | 0.57        |                 |              | 0.56         | 0.81                      | --                            | 0.62                 | 0.74                    | 0.45                   |
| TMS logger top shield cover             |           |                   |                                  |                             |          |               |                     |            |                   |             |                 |              | 0.32         | 0.82                      | 0.62                          | --                   | 0.59                    |                        |
| TMS logger bottom shield cover          |           |                   |                                  |                             |          |               |                     |            | -0.41             | 0.53        |                 |              | 0.58         | 0.75                      | 0.74                          | 0.59                 | --                      | 0.54                   |
| ground cover at logger                  |           |                   |                                  |                             |          |               |                     |            | -0.48             | 0.64        |                 |              | 0.39         | 0.38                      | 0.45                          |                      | 0.54                    | --                     |

**Table S6:** Effect sizes (scaled & centred, backscaled, and converted into °C per meaningful units) for predictor variables for all models. One unit corresponds to the following respective difference for each predictor variable: 100m elevation; 1° slope angle; 1% relative solar radiation; 1 step on the categorical landform scale; 10% vol. soil moisture; 10 days of snow cover; 10% cover of rocks, shrubs, bryophytes or lichen; 1 cm vegetation height.

| model response     | circle radius | temp. variable | predictor         | post. 2.5% quantile | post. mean | post. 97.5% quantile | post. 2.5% quantile (backscaled) | post. mean (backscaled) | post. 97.5% quantile (backscaled) | post. 2.5% quantile (°C per unit) | post. mean (°C per unit) | post. 97.5% quantile (°C per unit) |
|--------------------|---------------|----------------|-------------------|---------------------|------------|----------------------|----------------------------------|-------------------------|-----------------------------------|-----------------------------------|--------------------------|------------------------------------|
| canopy-layer temp. | 50            | mean           | Intercept         | 10.599              | 10.668     | 10.738               |                                  |                         |                                   |                                   |                          |                                    |
|                    |               |                | elevation         | -0.290              | -0.191     | -0.092               | -68.725                          | -45.365                 | -21.880                           | -0.122                            | -0.081                   | -0.039                             |
|                    |               |                | slope angle       | -0.015              | 0.083      | 0.178                | -0.113                           | 0.616                   | 1.320                             | -0.002                            | 0.011                    | 0.024                              |
|                    |               |                | solar radiation   | 0.014               | 0.088      | 0.167                | 0.001                            | 0.005                   | 0.009                             | 0.003                             | 0.016                    | 0.031                              |
|                    |               |                | landform          | -0.019              | 0.048      | 0.120                | -0.017                           | 0.042                   | 0.104                             | -0.022                            | 0.055                    | 0.138                              |
|                    |               |                | soil moisture     | -0.164              | -0.083     | 0.005                | -0.016                           | -0.008                  | 0.000                             | -0.170                            | -0.086                   | 0.005                              |
|                    |               |                | rock cover        | 0.107               | 0.205      | 0.305                | 1.878                            | 3.617                   | 5.379                             | 0.060                             | 0.116                    | 0.173                              |
|                    |               |                | shrub cover       | -0.038              | 0.066      | 0.178                | -0.959                           | 1.678                   | 4.534                             | -0.015                            | 0.026                    | 0.070                              |
|                    |               |                | bryophyte cover   | -0.137              | -0.054     | 0.021                | -2.749                           | -1.083                  | 0.416                             | -0.069                            | -0.027                   | 0.010                              |
|                    |               |                | lichen cover      | 0.040               | 0.117      | 0.203                | 0.579                            | 1.687                   | 2.913                             | 0.028                             | 0.082                    | 0.141                              |
|                    |               |                | vegetation height | 0.015               | 0.099      | 0.185                | 0.039                            | 0.266                   | 0.496                             | 0.005                             | 0.037                    | 0.069                              |
| canopy-layer temp. | 50            | min            | Intercept         | 5.484               | 5.576      | 5.670                |                                  |                         |                                   |                                   |                          |                                    |
|                    |               |                | elevation         | -0.275              | -0.131     | -0.003               | -65.316                          | -31.097                 | -0.616                            | -0.116                            | -0.055                   | -0.001                             |
|                    |               |                | slope angle       | 0.028               | 0.163      | 0.297                | 0.209                            | 1.211                   | 2.205                             | 0.004                             | 0.022                    | 0.040                              |
|                    |               |                | solar radiation   | 0.043               | 0.157      | 0.259                | 0.002                            | 0.009                   | 0.014                             | 0.008                             | 0.029                    | 0.048                              |
|                    |               |                | landform          | -0.008              | 0.088      | 0.183                | -0.007                           | 0.077                   | 0.159                             | -0.009                            | 0.102                    | 0.210                              |
|                    |               |                | soil moisture     | -0.258              | -0.140     | -0.025               | -0.025                           | -0.014                  | -0.002                            | -0.267                            | -0.145                   | -0.026                             |
|                    |               |                | rock cover        | 0.024               | 0.171      | 0.307                | 0.423                            | 3.011                   | 5.404                             | 0.014                             | 0.097                    | 0.174                              |
|                    |               |                | shrub cover       | -0.259              | -0.112     | 0.037                | -6.601                           | -2.847                  | 0.931                             | -0.101                            | -0.044                   | 0.014                              |
|                    |               |                | bryophyte cover   | -0.122              | -0.017     | 0.094                | -2.443                           | -0.331                  | 1.885                             | -0.061                            | -0.008                   | 0.047                              |
|                    |               |                | lichen cover      | 0.044               | 0.155      | 0.265                | 0.626                            | 2.229                   | 3.815                             | 0.030                             | 0.108                    | 0.184                              |
|                    |               |                | vegetation height | -0.217              | -0.104     | 0.017                | -0.582                           | -0.279                  | 0.045                             | -0.081                            | -0.039                   | 0.006                              |
| canopy-layer temp. | 50            | max            | Intercept         | 16.105              | 16.255     | 16.415               |                                  |                         |                                   |                                   |                          |                                    |
|                    |               |                | elevation         | -0.595              | -0.365     | -0.156               | -141.338                         | -86.731                 | -36.971                           | -0.251                            | -0.154                   | -0.066                             |
|                    |               |                | slope angle       | 0.143               | 0.350      | 0.561                | 1.062                            | 2.597                   | 4.164                             | 0.019                             | 0.047                    | 0.075                              |

| model response             | circle radius | temp. variable | predictor         | post. 2.5% quantile | post. mean | post. 97.5% quantile | post. 2.5% quantile (backscaled) | post. mean (backscaled) | post. 97.5% quantile (backscaled) | post. 2.5% quantile (°C per unit) | post. mean (°C per unit) | post. 97.5% quantile (°C per unit) |
|----------------------------|---------------|----------------|-------------------|---------------------|------------|----------------------|----------------------------------|-------------------------|-----------------------------------|-----------------------------------|--------------------------|------------------------------------|
| canopy-layer temp. (cont.) | 50            | max            | solar radiation   | -0.242              | -0.070     | 0.106                | -0.013                           | -0.004                  | 0.006                             | -0.045                            | -0.013                   | 0.020                              |
|                            |               |                | landform          | -0.179              | -0.019     | 0.135                | -0.156                           | -0.017                  | 0.117                             | -0.206                            | -0.022                   | 0.155                              |
|                            |               |                | soil moisture     | -0.330              | -0.148     | 0.044                | -0.032                           | -0.014                  | 0.004                             | -0.342                            | -0.153                   | 0.046                              |
|                            |               |                | rock cover        | -0.042              | 0.183      | 0.408                | -0.736                           | 3.222                   | 7.197                             | -0.024                            | 0.104                    | 0.232                              |
|                            |               |                | shrub cover       | 0.024               | 0.256      | 0.473                | 0.603                            | 6.536                   | 12.062                            | 0.009                             | 0.100                    | 0.185                              |
|                            |               |                | bryophyte cover   | -0.310              | -0.136     | 0.033                | -6.200                           | -2.720                  | 0.659                             | -0.155                            | -0.068                   | 0.016                              |
|                            |               |                | lichen cover      | -0.194              | -0.002     | 0.173                | -2.796                           | -0.036                  | 2.482                             | -0.135                            | -0.002                   | 0.120                              |
|                            |               |                | vegetation height | 0.275               | 0.460      | 0.652                | 0.737                            | 1.234                   | 1.750                             | 0.102                             | 0.171                    | 0.243                              |
| near-surface temp.         | 50            | mean           | Intercept         | 11.405              | 11.525     | 11.635               |                                  |                         |                                   |                                   |                          |                                    |
|                            |               |                | elevation         | -0.257              | -0.087     | 0.078                | -60.918                          | -20.561                 | 18.432                            | -0.108                            | -0.036                   | 0.033                              |
|                            |               |                | slope angle       | -0.046              | 0.125      | 0.280                | -0.339                           | 0.932                   | 2.077                             | -0.006                            | 0.017                    | 0.038                              |
|                            |               |                | solar radiation   | 0.087               | 0.215      | 0.349                | 0.005                            | 0.012                   | 0.019                             | 0.016                             | 0.040                    | 0.065                              |
|                            |               |                | landform          | -0.059              | 0.062      | 0.180                | -0.051                           | 0.054                   | 0.156                             | -0.068                            | 0.072                    | 0.207                              |
|                            |               |                | soil moisture     | -0.300              | -0.156     | -0.014               | -0.029                           | -0.015                  | -0.001                            | -0.311                            | -0.161                   | -0.014                             |
|                            |               |                | rock cover        | 0.030               | 0.202      | 0.390                | 0.524                            | 3.560                   | 6.873                             | 0.017                             | 0.115                    | 0.221                              |
|                            |               |                | shrub cover       | -0.099              | 0.074      | 0.253                | -2.515                           | 1.891                   | 6.457                             | -0.039                            | 0.029                    | 0.099                              |
|                            |               |                | bryophyte cover   | -0.366              | -0.227     | -0.100               | -7.333                           | -4.552                  | -2.002                            | -0.183                            | -0.114                   | -0.050                             |
|                            |               |                | lichen cover      | -0.069              | 0.078      | 0.210                | -0.988                           | 1.124                   | 3.015                             | -0.048                            | 0.054                    | 0.146                              |
|                            |               |                | vegetation height | -0.211              | -0.070     | 0.079                | -0.565                           | -0.189                  | 0.213                             | -0.078                            | -0.026                   | 0.030                              |
| near-surface temp.         | 50            | min            | Intercept         | 5.327               | 5.455      | 5.576                |                                  |                         |                                   |                                   |                          |                                    |
|                            |               |                | elevation         | -0.435              | -0.253     | -0.079               | -103.222                         | -60.141                 | -18.782                           | -0.183                            | -0.107                   | -0.033                             |
|                            |               |                | slope angle       | -0.003              | 0.161      | 0.335                | -0.022                           | 1.193                   | 2.485                             | 0.000                             | 0.022                    | 0.045                              |
|                            |               |                | solar radiation   | -0.033              | 0.106      | 0.241                | -0.002                           | 0.006                   | 0.013                             | -0.006                            | 0.020                    | 0.044                              |
|                            |               |                | landform          | -0.019              | 0.107      | 0.233                | -0.016                           | 0.093                   | 0.202                             | -0.022                            | 0.123                    | 0.268                              |
|                            |               |                | soil moisture     | -0.138              | 0.002      | 0.172                | -0.013                           | 0.000                   | 0.017                             | -0.143                            | 0.002                    | 0.178                              |
|                            |               |                | rock cover        | 0.176               | 0.362      | 0.544                | 3.097                            | 6.371                   | 9.592                             | 0.100                             | 0.205                    | 0.309                              |
|                            |               |                | shrub cover       | -0.355              | -0.164     | 0.020                | -9.061                           | -4.196                  | 0.520                             | -0.139                            | -0.064                   | 0.008                              |
|                            |               |                | bryophyte cover   | -0.244              | -0.099     | 0.044                | -4.891                           | -1.990                  | 0.889                             | -0.122                            | -0.050                   | 0.022                              |
|                            |               |                | lichen cover      | -0.064              | 0.093      | 0.237                | -0.917                           | 1.337                   | 3.408                             | -0.044                            | 0.065                    | 0.165                              |
|                            |               |                | vegetation height | -0.194              | -0.054     | 0.115                | -0.521                           | -0.145                  | 0.308                             | -0.072                            | -0.020                   | 0.043                              |

| model response              | circle radius | temp. variable | predictor       | post. 2.5% quantile | post. mean | post. 97.5% quantile | post. 2.5% quantile (backscaled) | post. mean (backscaled) | post. 97.5% quantile (backscaled) | post. 2.5% quantile (°C per unit) | post. mean (°C per unit) | post. 97.5% quantile (°C per unit) |
|-----------------------------|---------------|----------------|-----------------|---------------------|------------|----------------------|----------------------------------|-------------------------|-----------------------------------|-----------------------------------|--------------------------|------------------------------------|
| near-surface temp.          | 50            | max            | Intercept       | 18.813              | 19.091     | 19.434               |                                  |                         |                                   |                                   |                          |                                    |
|                             |               |                | elevation       | -0.489              | -0.038     | 0.401                | -116.138                         | -8.919                  | 95.152                            | -0.206                            | -0.016                   | 0.169                              |
|                             |               |                | slope angle     | 0.128               | 0.546      | 0.967                | 0.948                            | 4.056                   | 7.181                             | 0.017                             | 0.074                    | 0.130                              |
|                             |               |                | solar radiation | -0.038              | 0.326      | 0.655                | -0.002                           | 0.018                   | 0.035                             | -0.007                            | 0.060                    | 0.121                              |
|                             |               |                | landform        | -0.452              | -0.133     | 0.170                | -0.392                           | -0.115                  | 0.147                             | -0.520                            | -0.153                   | 0.195                              |
|                             |               |                | soil moisture   | -0.917              | -0.513     | -0.164               | -0.089                           | -0.050                  | -0.016                            | -0.950                            | -0.531                   | -0.170                             |
|                             |               |                | rock cover      | -0.464              | -0.014     | 0.464                | -8.184                           | -0.249                  | 8.171                             | -0.264                            | -0.008                   | 0.263                              |
|                             |               |                | shrub cover     | 0.170               | 0.647      | 1.121                | 4.337                            | 16.507                  | 28.605                            | 0.067                             | 0.254                    | 0.440                              |
|                             |               |                | bryophyte cover | -0.902              | -0.524     | -0.187               | -18.042                          | -10.483                 | -3.739                            | -0.451                            | -0.262                   | -0.093                             |
|                             |               |                | lichen cover    | -0.503              | -0.156     | 0.219                | -7.238                           | -2.250                  | 3.153                             | -0.350                            | -0.109                   | 0.152                              |
| vegetation height           | -0.358        | 0.025          | 0.397           | -0.962              | 0.066      | 1.065                | -0.134                           | 0.009                   | 0.148                             |                                   |                          |                                    |
| soil temp. (growing season) | 50            | mean           | Intercept       | 10.890              | 11.162     | 11.437               |                                  |                         |                                   |                                   |                          |                                    |
|                             |               |                | elevation       | -0.166              | 0.200      | 0.616                | -39.457                          | 47.582                  | 146.125                           | -0.070                            | 0.084                    | 0.259                              |
|                             |               |                | slope angle     | -0.096              | 0.276      | 0.665                | -0.717                           | 2.047                   | 4.938                             | -0.013                            | 0.037                    | 0.090                              |
|                             |               |                | solar radiation | 0.023               | 0.358      | 0.658                | 0.001                            | 0.019                   | 0.036                             | 0.004                             | 0.066                    | 0.122                              |
|                             |               |                | landform        | -0.034              | 0.256      | 0.517                | -0.029                           | 0.222                   | 0.449                             | -0.039                            | 0.295                    | 0.595                              |
|                             |               |                | soil moisture   | -0.383              | -0.047     | 0.280                | -0.037                           | -0.004                  | 0.027                             | -0.397                            | -0.048                   | 0.290                              |
|                             |               |                | rock cover      | -0.178              | 0.234      | 0.648                | -3.132                           | 4.121                   | 11.411                            | -0.101                            | 0.133                    | 0.367                              |
|                             |               |                | shrub cover     | -0.982              | -0.587     | -0.142               | -25.038                          | -14.971                 | -3.627                            | -0.385                            | -0.230                   | -0.056                             |
|                             |               |                | bryophyte cover | -0.987              | -0.702     | -0.352               | -19.752                          | -14.043                 | -7.036                            | -0.493                            | -0.351                   | -0.176                             |
|                             |               |                | lichen cover    | -0.449              | -0.146     | 0.178                | -6.461                           | -2.097                  | 2.561                             | -0.312                            | -0.101                   | 0.124                              |
| vegetation height           | -0.797        | -0.453         | -0.118          | -2.139              | -1.215     | -0.317               | -0.297                           | -0.169                  | -0.044                            |                                   |                          |                                    |
| soil temp. (growing season) | 50            | min            | Intercept       | 8.648               | 8.893      | 9.117                |                                  |                         |                                   |                                   |                          |                                    |
|                             |               |                | elevation       | -0.321              | 0.057      | 0.389                | -76.281                          | 13.640                  | 92.368                            | -0.135                            | 0.024                    | 0.164                              |
|                             |               |                | slope angle     | -0.141              | 0.188      | 0.538                | -1.050                           | 1.395                   | 3.998                             | -0.019                            | 0.025                    | 0.072                              |
|                             |               |                | solar radiation | -0.032              | 0.224      | 0.509                | -0.002                           | 0.012                   | 0.028                             | -0.006                            | 0.041                    | 0.094                              |
|                             |               |                | landform        | -0.124              | 0.121      | 0.388                | -0.108                           | 0.105                   | 0.337                             | -0.143                            | 0.139                    | 0.447                              |
|                             |               |                | soil moisture   | -0.200              | 0.080      | 0.392                | -0.019                           | 0.008                   | 0.038                             | -0.207                            | 0.083                    | 0.406                              |
|                             |               |                | rock cover      | -0.093              | 0.301      | 0.675                | -1.639                           | 5.312                   | 11.900                            | -0.053                            | 0.171                    | 0.383                              |
|                             |               |                | shrub cover     | -0.468              | -0.092     | 0.277                | -11.935                          | -2.355                  | 7.061                             | -0.183                            | -0.036                   | 0.109                              |

| model response                      | circle radius | temp. variable | predictor           | post. 2.5% quantile | post. mean | post. 97.5% quantile | post. 2.5% quantile (backscaled) | post. mean (backscaled) | post. 97.5% quantile (backscaled) | post. 2.5% quantile (°C per unit) | post. mean (°C per unit) | post. 97.5% quantile (°C per unit) |
|-------------------------------------|---------------|----------------|---------------------|---------------------|------------|----------------------|----------------------------------|-------------------------|-----------------------------------|-----------------------------------|--------------------------|------------------------------------|
| soil temp. (growing season) (cont.) | 50            | min            | bryophyte cover     | -0.877              | -0.600     | -0.312               | -17.551                          | -11.999                 | -6.253                            | -0.438                            | -0.300                   | -0.156                             |
|                                     |               |                | lichen cover        | -0.223              | 0.070      | 0.368                | -3.203                           | 1.008                   | 5.286                             | -0.155                            | 0.049                    | 0.256                              |
|                                     |               |                | vegetation height   | -0.711              | -0.408     | -0.111               | -1.910                           | -1.095                  | -0.297                            | -0.265                            | -0.152                   | -0.041                             |
| soil temp. (growing season)         | 50            | max            | Intercept           | 13.700              | 14.074     | 14.451               |                                  |                         |                                   |                                   |                          |                                    |
|                                     |               |                | elevation           | -0.184              | 0.357      | 0.914                | -43.563                          | 84.675                  | 216.996                           | -0.077                            | 0.150                    | 0.385                              |
|                                     |               |                | slope angle         | -0.049              | 0.438      | 0.966                | -0.361                           | 3.251                   | 7.178                             | -0.007                            | 0.059                    | 0.130                              |
|                                     |               |                | solar radiation     | -0.049              | 0.373      | 0.793                | -0.003                           | 0.020                   | 0.043                             | -0.009                            | 0.069                    | 0.147                              |
|                                     |               |                | landform            | 0.023               | 0.414      | 0.799                | 0.020                            | 0.359                   | 0.694                             | 0.026                             | 0.476                    | 0.920                              |
|                                     |               |                | soil moisture       | -0.662              | -0.227     | 0.258                | -0.064                           | -0.022                  | 0.025                             | -0.686                            | -0.235                   | 0.267                              |
|                                     |               |                | rock cover          | -0.508              | 0.023      | 0.597                | -8.948                           | 0.397                   | 10.514                            | -0.288                            | 0.013                    | 0.339                              |
|                                     |               |                | shrub cover         | -1.667              | -1.124     | -0.500               | -42.521                          | -28.681                 | -12.761                           | -0.654                            | -0.441                   | -0.196                             |
|                                     |               |                | bryophyte cover     | -1.339              | -0.890     | -0.484               | -26.786                          | -17.815                 | -9.694                            | -0.669                            | -0.445                   | -0.242                             |
|                                     |               |                | lichen cover        | -0.931              | -0.488     | -0.062               | -13.393                          | -7.019                  | -0.896                            | -0.647                            | -0.339                   | -0.043                             |
| vegetation height                   | -0.979        | -0.550         | -0.044              | -2.628              | -1.477     | -0.119               | -0.365                           | -0.205                  | -0.017                            |                                   |                          |                                    |
| soil temp. (winter)                 | 50            | mean           | Intercept           | -6.442              | -6.006     | -5.547               |                                  |                         |                                   |                                   |                          |                                    |
|                                     |               |                | elevation           | -1.143              | -0.525     | 0.069                | -271.266                         | -124.655                | 16.268                            | -0.482                            | -0.221                   | 0.029                              |
|                                     |               |                | solar radiation     | -1.061              | -0.506     | -0.006               | -0.068                           | -0.033                  | 0.000                             | -0.165                            | -0.079                   | -0.001                             |
|                                     |               |                | landform            | -0.604              | -0.103     | 0.383                | -0.525                           | -0.089                  | 0.333                             | -0.696                            | -0.119                   | 0.441                              |
|                                     |               |                | snow cover duration | 2.508               | 2.985      | 3.554                | 95.317                           | 113.466                 | 135.094                           | 0.660                             | 0.785                    | 0.935                              |
|                                     |               |                | rock cover          | -1.479              | -0.925     | -0.302               | -26.059                          | -16.300                 | -5.320                            | -0.839                            | -0.525                   | -0.171                             |
|                                     |               |                | shrub cover         | -1.281              | -0.626     | 0.009                | -32.674                          | -15.966                 | 0.230                             | -0.502                            | -0.245                   | 0.004                              |
|                                     |               |                | bryophyte cover     | -0.899              | -0.391     | 0.108                | -17.988                          | -7.833                  | 2.164                             | -0.449                            | -0.196                   | 0.054                              |
|                                     |               |                | lichen cover        | -1.262              | -0.701     | -0.165               | -18.151                          | -10.076                 | -2.375                            | -0.877                            | -0.487                   | -0.115                             |
|                                     |               |                | vegetation height   | -0.658              | -0.129     | 0.413                | -1.766                           | -0.346                  | 1.109                             | -0.245                            | -0.048                   | 0.154                              |
| soil temp. (winter)                 | 50            | min            | Intercept           | -6.927              | -6.434     | -5.995               |                                  |                         |                                   |                                   |                          |                                    |
|                                     |               |                | elevation           | -1.171              | -0.532     | 0.115                | -277.887                         | -126.202                | 27.260                            | -0.493                            | -0.224                   | 0.048                              |
|                                     |               |                | solar radiation     | -1.060              | -0.541     | 0.020                | -0.068                           | -0.035                  | 0.001                             | -0.164                            | -0.084                   | 0.003                              |
|                                     |               |                | landform            | -0.601              | -0.101     | 0.394                | -0.522                           | -0.088                  | 0.342                             | -0.692                            | -0.116                   | 0.454                              |
|                                     |               |                | snow cover duration | 2.895               | 3.405      | 3.943                | 110.025                          | 129.430                 | 149.871                           | 0.761                             | 0.896                    | 1.037                              |

| model response              | circle radius | temp. variable | predictor           | post. 2.5% quantile | post. mean | post. 97.5% quantile | post. 2.5% quantile (backscaled) | post. mean (backscaled) | post. 97.5% quantile (backscaled) | post. 2.5% quantile (°C per unit) | post. mean (°C per unit) | post. 97.5% quantile (°C per unit) |
|-----------------------------|---------------|----------------|---------------------|---------------------|------------|----------------------|----------------------------------|-------------------------|-----------------------------------|-----------------------------------|--------------------------|------------------------------------|
| soil temp. (winter) (cont.) | 50            | min            | rock cover          | -1.591              | -0.952     | -0.344               | -28.032                          | -16.779                 | -6.062                            | -0.903                            | -0.540                   | -0.195                             |
|                             |               |                | shrub cover         | -1.293              | -0.641     | 0.042                | -32.973                          | -16.348                 | 1.076                             | -0.507                            | -0.251                   | 0.017                              |
|                             |               |                | bryophyte cover     | -0.936              | -0.391     | 0.102                | -18.725                          | -7.821                  | 2.049                             | -0.468                            | -0.195                   | 0.051                              |
|                             |               |                | lichen cover        | -1.284              | -0.709     | -0.137               | -18.475                          | -10.201                 | -1.968                            | -0.893                            | -0.493                   | -0.095                             |
|                             |               |                | vegetation height   | -0.711              | -0.143     | 0.401                | -1.908                           | -0.383                  | 1.076                             | -0.265                            | -0.053                   | 0.149                              |
| soil temp. (winter)         | 50            | max            | Intercept           | -6.024              | -5.605     | -5.186               |                                  |                         |                                   |                                   |                          |                                    |
|                             |               |                | elevation           | -1.095              | -0.519     | 0.051                | -259.937                         | -123.256                | 12.046                            | -0.461                            | -0.219                   | 0.021                              |
|                             |               |                | solar radiation     | -0.953              | -0.479     | 0.069                | -0.061                           | -0.031                  | 0.004                             | -0.148                            | -0.074                   | 0.011                              |
|                             |               |                | landform            | -0.589              | -0.104     | 0.355                | -0.512                           | -0.090                  | 0.309                             | -0.679                            | -0.119                   | 0.409                              |
|                             |               |                | snow cover duration | 2.107               | 2.585      | 3.149                | 80.072                           | 98.271                  | 119.716                           | 0.554                             | 0.680                    | 0.829                              |
|                             |               |                | rock cover          | -1.496              | -0.915     | -0.352               | -26.361                          | -16.132                 | -6.202                            | -0.849                            | -0.520                   | -0.200                             |
|                             |               |                | shrub cover         | -1.260              | -0.615     | -0.027               | -32.133                          | -15.689                 | -0.690                            | -0.494                            | -0.241                   | -0.011                             |
|                             |               |                | bryophyte cover     | -0.881              | -0.391     | 0.129                | -17.623                          | -7.819                  | 2.577                             | -0.440                            | -0.195                   | 0.064                              |
|                             |               |                | lichen cover        | -1.247              | -0.699     | -0.152               | -17.943                          | -10.055                 | -2.185                            | -0.867                            | -0.486                   | -0.106                             |
|                             |               |                | vegetation height   | -0.643              | -0.114     | 0.434                | -1.725                           | -0.306                  | 1.165                             | -0.239                            | -0.042                   | 0.162                              |
| soil - canopy T difference  | 50            | mean           | Intercept           | 0.221               | 0.486      | 0.731                |                                  |                         |                                   |                                   |                          |                                    |
|                             |               |                | elevation           | -0.038              | 0.343      | 0.705                | -8.984                           | 81.464                  | 167.436                           | -0.016                            | 0.145                    | 0.297                              |
|                             |               |                | slope angle         | -0.118              | 0.252      | 0.605                | -0.879                           | 1.873                   | 4.493                             | -0.016                            | 0.034                    | 0.081                              |
|                             |               |                | solar radiation     | -0.009              | 0.282      | 0.567                | -0.001                           | 0.015                   | 0.031                             | -0.002                            | 0.052                    | 0.105                              |
|                             |               |                | landform            | -0.023              | 0.222      | 0.495                | -0.020                           | 0.193                   | 0.430                             | -0.026                            | 0.256                    | 0.570                              |
|                             |               |                | soil moisture       | -0.257              | 0.046      | 0.381                | -0.025                           | 0.004                   | 0.037                             | -0.266                            | 0.047                    | 0.394                              |
|                             |               |                | rock cover          | -0.403              | 0.005      | 0.387                | -7.099                           | 0.081                   | 6.819                             | -0.229                            | 0.003                    | 0.220                              |
|                             |               |                | shrub cover         | -1.092              | -0.693     | -0.278               | -27.854                          | -17.674                 | -7.088                            | -0.428                            | -0.272                   | -0.109                             |
|                             |               |                | bryophyte cover     | -0.928              | -0.639     | -0.323               | -18.571                          | -12.792                 | -6.456                            | -0.464                            | -0.319                   | -0.161                             |
|                             |               |                | lichen cover        | -0.630              | -0.318     | -0.004               | -9.064                           | -4.574                  | -0.056                            | -0.438                            | -0.221                   | -0.003                             |
| vegetation height           | -0.876        | -0.561         | -0.240              | -2.352              | -1.505     | -0.644               | -0.326                           | -0.209                  | -0.089                            |                                   |                          |                                    |
| soil - canopy T difference  | 50            | min            | Intercept           | -7.627              | -7.364     | -7.098               |                                  |                         |                                   |                                   |                          |                                    |
|                             |               |                | elevation           | 0.018               | 0.392      | 0.763                | 4.340                            | 92.965                  | 181.169                           | 0.008                             | 0.165                    | 0.322                              |
|                             |               |                | slope angle         | -0.485              | -0.111     | 0.257                | -3.600                           | -0.827                  | 1.906                             | -0.065                            | -0.015                   | 0.035                              |
|                             |               |                | solar radiation     | 0.031               | 0.304      | 0.594                | 0.002                            | 0.016                   | 0.032                             | 0.006                             | 0.056                    | 0.110                              |

| model response                     | circle radius | temp. variable | predictor         | post. 2.5% quantile | post. mean | post. 97.5% quantile | post. 2.5% quantile (backscaled) | post. mean (backscaled) | post. 97.5% quantile (backscaled) | post. 2.5% quantile (°C per unit) | post. mean (°C per unit) | post. 97.5% quantile (°C per unit) |  |
|------------------------------------|---------------|----------------|-------------------|---------------------|------------|----------------------|----------------------------------|-------------------------|-----------------------------------|-----------------------------------|--------------------------|------------------------------------|--|
| soil - canopy T difference (cont.) | 50            | min            | landform          | -0.122              | 0.154      | 0.421                | -0.106                           | 0.134                   | 0.366                             | -0.141                            | 0.177                    | 0.485                              |  |
|                                    |               |                | soil moisture     | -0.094              | 0.235      | 0.537                | -0.009                           | 0.023                   | 0.052                             | -0.097                            | 0.243                    | 0.556                              |  |
|                                    |               |                | rock cover        | -0.309              | 0.096      | 0.502                | -5.444                           | 1.699                   | 8.852                             | -0.175                            | 0.055                    | 0.285                              |  |
|                                    |               |                | shrub cover       | -0.780              | -0.365     | 0.032                | -19.908                          | -9.315                  | 0.810                             | -0.306                            | -0.143                   | 0.012                              |  |
|                                    |               |                | bryophyte cover   | -0.745              | -0.461     | -0.150               | -14.914                          | -9.227                  | -3.011                            | -0.372                            | -0.230                   | -0.075                             |  |
|                                    |               |                | lichen cover      | -0.290              | 0.021      | 0.318                | -4.175                           | 0.295                   | 4.576                             | -0.202                            | 0.014                    | 0.221                              |  |
|                                    |               |                | vegetation height | -1.198              | -0.886     | -0.556               | -3.216                           | -2.379                  | -1.494                            | -0.446                            | -0.330                   | -0.207                             |  |
| soil - canopy T difference         | 50            | max            | Intercept         | -2.594              | -2.208     | -1.809               |                                  |                         |                                   |                                   |                          |                                    |  |
|                                    |               |                | elevation         | 0.064               | 0.639      | 1.181                | 15.137                           | 151.654                 | 280.360                           | 0.027                             | 0.269                    | 0.498                              |  |
|                                    |               |                | slope angle       | -0.377              | 0.136      | 0.721                | -2.799                           | 1.008                   | 5.354                             | -0.051                            | 0.018                    | 0.097                              |  |
|                                    |               |                | solar radiation   | 0.009               | 0.465      | 0.914                | 0.000                            | 0.025                   | 0.049                             | 0.002                             | 0.086                    | 0.169                              |  |
|                                    |               |                | landform          | 0.053               | 0.455      | 0.863                | 0.046                            | 0.395                   | 0.750                             | 0.061                             | 0.524                    | 0.994                              |  |
|                                    |               |                | soil moisture     | -0.548              | -0.082     | 0.409                | -0.053                           | -0.008                  | 0.040                             | -0.568                            | -0.085                   | 0.424                              |  |
|                                    |               |                | rock cover        | -0.725              | -0.161     | 0.435                | -12.778                          | -2.830                  | 7.668                             | -0.412                            | -0.091                   | 0.247                              |  |
|                                    |               |                | shrub cover       | -2.081              | -1.443     | -0.854               | -53.088                          | -36.795                 | -21.791                           | -0.816                            | -0.566                   | -0.335                             |  |
|                                    |               |                | bryophyte cover   | -1.200              | -0.750     | -0.310               | -24.013                          | -15.016                 | -6.212                            | -0.600                            | -0.375                   | -0.155                             |  |
|                                    |               |                | lichen cover      | -0.998              | -0.541     | -0.055               | -14.360                          | -7.782                  | -0.792                            | -0.694                            | -0.376                   | -0.038                             |  |
| vegetation height                  | -1.493        | -1.010         | -0.522            | -4.009              | -2.712     | -1.401               | -0.556                           | -0.376                  | -0.194                            |                                   |                          |                                    |  |
| near-surface - canopy T difference | 50            | mean           | Intercept         | 0.748               | 0.842      | 0.935                |                                  |                         |                                   |                                   |                          |                                    |  |
|                                    |               |                | elevation         | -0.022              | 0.104      | 0.238                | -5.230                           | 24.573                  | 56.519                            | -0.009                            | 0.044                    | 0.100                              |  |
|                                    |               |                | slope angle       | -0.074              | 0.056      | 0.184                | -0.549                           | 0.418                   | 1.364                             | -0.010                            | 0.008                    | 0.025                              |  |
|                                    |               |                | solar radiation   | 0.023               | 0.129      | 0.226                | 0.001                            | 0.007                   | 0.012                             | 0.004                             | 0.024                    | 0.042                              |  |
|                                    |               |                | landform          | -0.078              | 0.017      | 0.119                | -0.068                           | 0.015                   | 0.103                             | -0.090                            | 0.019                    | 0.137                              |  |
|                                    |               |                | soil moisture     | -0.176              | -0.070     | 0.041                | -0.017                           | -0.007                  | 0.004                             | -0.183                            | -0.072                   | 0.042                              |  |
|                                    |               |                | rock cover        | -0.135              | 0.003      | 0.141                | -2.371                           | 0.049                   | 2.487                             | -0.076                            | 0.002                    | 0.080                              |  |
|                                    |               |                | shrub cover       | -0.143              | -0.003     | 0.135                | -3.653                           | -0.087                  | 3.449                             | -0.056                            | -0.001                   | 0.053                              |  |
|                                    |               |                | bryophyte cover   | -0.261              | -0.158     | -0.045               | -5.224                           | -3.157                  | -0.899                            | -0.130                            | -0.079                   | -0.022                             |  |
|                                    |               |                | lichen cover      | -0.145              | -0.037     | 0.077                | -2.088                           | -0.525                  | 1.114                             | -0.101                            | -0.025                   | 0.054                              |  |
| vegetation height                  | -0.281        | -0.161         | -0.055            | -0.753              | -0.433     | -0.147               | -0.105                           | -0.060                  | -0.020                            |                                   |                          |                                    |  |



| model response                     | circle radius | temp. variable | predictor       | post. 2.5% quantile | post. mean | post. 97.5% quantile | post. 2.5% quantile (backscaled) | post. mean (backscaled) | post. 97.5% quantile (backscaled) | post. 2.5% quantile (°C per unit) | post. mean (°C per unit) | post. 97.5% quantile (°C per unit) |
|------------------------------------|---------------|----------------|-----------------|---------------------|------------|----------------------|----------------------------------|-------------------------|-----------------------------------|-----------------------------------|--------------------------|------------------------------------|
| near-surface - canopy T difference | 50            | min            | Intercept       | -10.966             | 10.802     | -10.601              |                                  |                         |                                   |                                   |                          |                                    |
|                                    |               |                | elevation       | -0.194              | 0.095      | 0.351                | -45.997                          | 22.548                  | 83.255                            | -0.082                            | 0.040                    | 0.148                              |
|                                    |               |                | slope angle     | -0.433              | -0.166     | 0.092                | -3.219                           | -1.235                  | 0.684                             | -0.058                            | -0.022                   | 0.012                              |
|                                    |               |                | solar radiation | -0.032              | 0.179      | 0.386                | -0.002                           | 0.010                   | 0.021                             | -0.006                            | 0.033                    | 0.071                              |
|                                    |               |                | landform        | -0.058              | 0.135      | 0.318                | -0.050                           | 0.117                   | 0.276                             | -0.067                            | 0.155                    | 0.366                              |
|                                    |               |                | soil moisture   | -0.073              | 0.150      | 0.373                | -0.007                           | 0.014                   | 0.036                             | -0.075                            | 0.155                    | 0.386                              |
|                                    |               |                | rock cover      | -0.119              | 0.168      | 0.433                | -2.094                           | 2.960                   | 7.635                             | -0.067                            | 0.095                    | 0.246                              |
|                                    |               |                | shrub cover     | -0.741              | -0.440     | -0.162               | -18.891                          | -11.229                 | -4.138                            | -0.290                            | -0.173                   | -0.064                             |
|                                    |               |                | bryophyte cover | -0.163              | 0.045      | 0.258                | -3.256                           | 0.900                   | 5.173                             | -0.081                            | 0.022                    | 0.129                              |
|                                    |               |                | lichen cover    | -0.161              | 0.079      | 0.285                | -2.317                           | 1.133                   | 4.094                             | -0.112                            | 0.055                    | 0.198                              |
| vegetation height                  | -0.739        | -0.516         | -0.287          | -1.983              | -1.385     | -0.772               | -0.275                           | -0.192                  | -0.107                            |                                   |                          |                                    |
| near-surface - canopy T difference | 50            | max            | Intercept       | 2.533               | 2.779      | 3.024                |                                  |                         |                                   |                                   |                          |                                    |
|                                    |               |                | elevation       | -0.014              | 0.330      | 0.704                | -3.296                           | 78.363                  | 167.159                           | -0.006                            | 0.139                    | 0.297                              |
|                                    |               |                | slope angle     | -0.125              | 0.214      | 0.564                | -0.929                           | 1.591                   | 4.186                             | -0.017                            | 0.029                    | 0.076                              |
|                                    |               |                | solar radiation | 0.106               | 0.383      | 0.654                | 0.006                            | 0.021                   | 0.035                             | 0.020                             | 0.071                    | 0.121                              |
|                                    |               |                | landform        | -0.361              | -0.110     | 0.151                | -0.314                           | -0.096                  | 0.131                             | -0.416                            | -0.127                   | 0.174                              |
|                                    |               |                | soil moisture   | -0.641              | -0.357     | -0.067               | -0.062                           | -0.035                  | -0.006                            | -0.664                            | -0.370                   | -0.069                             |
|                                    |               |                | rock cover      | -0.546              | -0.169     | 0.210                | -9.619                           | -2.972                  | 3.697                             | -0.310                            | -0.096                   | 0.119                              |
|                                    |               |                | shrub cover     | -0.035              | 0.333      | 0.720                | -0.904                           | 8.485                   | 18.365                            | -0.014                            | 0.130                    | 0.282                              |
|                                    |               |                | bryophyte cover | -0.615              | -0.345     | -0.064               | -12.315                          | -6.909                  | -1.289                            | -0.308                            | -0.173                   | -0.032                             |
|                                    |               |                | lichen cover    | -0.408              | -0.113     | 0.163                | -5.874                           | -1.624                  | 2.349                             | -0.284                            | -0.079                   | 0.114                              |
| vegetation height                  | -0.677        | -0.392         | -0.083          | -1.817              | -1.051     | -0.222               | -0.252                           | -0.146                  | -0.031                            |                                   |                          |                                    |
| soil - near-surface T difference   | 50            | mean           | Intercept       | -0.571              | -0.367     | -0.137               |                                  |                         |                                   |                                   |                          |                                    |
|                                    |               |                | elevation       | -0.018              | 0.283      | 0.612                | -4.226                           | 67.188                  | 145.152                           | -0.008                            | 0.119                    | 0.258                              |
|                                    |               |                | slope angle     | -0.126              | 0.159      | 0.469                | -0.933                           | 1.178                   | 3.481                             | -0.017                            | 0.021                    | 0.063                              |
|                                    |               |                | solar radiation | -0.099              | 0.144      | 0.384                | -0.005                           | 0.008                   | 0.021                             | -0.018                            | 0.027                    | 0.071                              |
|                                    |               |                | landform        | -0.049              | 0.195      | 0.401                | -0.043                           | 0.169                   | 0.348                             | -0.057                            | 0.225                    | 0.462                              |
|                                    |               |                | soil moisture   | -0.154              | 0.112      | 0.384                | -0.015                           | 0.011                   | 0.037                             | -0.160                            | 0.116                    | 0.397                              |
|                                    |               |                | rock cover      | -0.282              | 0.027      | 0.352                | -4.962                           | 0.479                   | 6.210                             | -0.160                            | 0.015                    | 0.200                              |
|                                    |               |                | shrub cover     | -1.026              | -0.672     | -0.352               | -26.167                          | -17.146                 | -8.973                            | -0.402                            | -0.264                   | -0.138                             |

| model response                           | circle radius | temp. variable | predictor         | post. 2.5% quantile | post. mean | post. 97.5% quantile | post. 2.5% quantile (backscaled) | post. mean (backscaled) | post. 97.5% quantile (backscaled) | post. 2.5% quantile (°C per unit) | post. mean (°C per unit) | post. 97.5% quantile (°C per unit) |  |
|------------------------------------------|---------------|----------------|-------------------|---------------------|------------|----------------------|----------------------------------|-------------------------|-----------------------------------|-----------------------------------|--------------------------|------------------------------------|--|
| soil - near-surface T difference (cont.) | 50            | mean           | bryophyte cover   | -0.719              | -0.474     | -0.221               | -14.390                          | -9.495                  | -4.430                            | -0.359                            | -0.237                   | -0.111                             |  |
|                                          |               |                | lichen cover      | -0.481              | -0.230     | 0.042                | -6.919                           | -3.301                  | 0.606                             | -0.334                            | -0.160                   | 0.029                              |  |
|                                          |               |                | vegetation height | -0.681              | -0.385     | -0.133               | -1.828                           | -1.035                  | -0.356                            | -0.254                            | -0.144                   | -0.049                             |  |
| soil - near-surface T difference         | 50            | min            | Intercept         | -10.542             | 10.199     | -9.866               |                                  |                         |                                   |                                   |                          |                                    |  |
|                                          |               |                | elevation         | -0.377              | 0.104      | 0.598                | -89.444                          | 24.732                  | 142.048                           | -0.159                            | 0.044                    | 0.252                              |  |
|                                          |               |                | slope angle       | -0.858              | -0.354     | 0.075                | -6.374                           | -2.632                  | 0.557                             | -0.116                            | -0.048                   | 0.010                              |  |
|                                          |               |                | solar radiation   | -0.462              | -0.093     | 0.320                | -0.025                           | -0.005                  | 0.017                             | -0.085                            | -0.017                   | 0.059                              |  |
|                                          |               |                | landform          | -0.095              | 0.259      | 0.592                | -0.083                           | 0.225                   | 0.514                             | -0.110                            | 0.298                    | 0.681                              |  |
|                                          |               |                | soil moisture     | 0.168               | 0.587      | 1.001                | 0.016                            | 0.057                   | 0.097                             | 0.174                             | 0.608                    | 1.036                              |  |
|                                          |               |                | rock cover        | -0.233              | 0.321      | 0.832                | -4.107                           | 5.651                   | 14.658                            | -0.132                            | 0.182                    | 0.472                              |  |
|                                          |               |                | shrub cover       | -1.250              | -0.730     | -0.184               | -31.892                          | -18.618                 | -4.695                            | -0.490                            | -0.286                   | -0.072                             |  |
|                                          |               |                | bryophyte cover   | -0.468              | -0.066     | 0.316                | -9.372                           | -1.321                  | 6.331                             | -0.234                            | -0.033                   | 0.158                              |  |
|                                          |               |                | lichen cover      | -0.153              | 0.233      | 0.644                | -2.200                           | 3.346                   | 9.259                             | -0.106                            | 0.162                    | 0.448                              |  |
| vegetation height                        | -0.839        | -0.436         | 0.009             | -2.251              | -1.171     | 0.023                | -0.312                           | -0.163                  | 0.003                             |                                   |                          |                                    |  |
| soil - near-surface T difference         | 50            | max            | Intercept         | -5.450              | -5.020     | -4.600               |                                  |                         |                                   |                                   |                          |                                    |  |
|                                          |               |                | elevation         | -0.200              | 0.398      | 1.023                | -47.525                          | 94.424                  | 242.760                           | -0.084                            | 0.168                    | 0.431                              |  |
|                                          |               |                | slope angle       | -0.724              | -0.114     | 0.465                | -5.381                           | -0.848                  | 3.452                             | -0.098                            | -0.015                   | 0.063                              |  |
|                                          |               |                | solar radiation   | -0.410              | 0.051      | 0.528                | -0.022                           | 0.003                   | 0.029                             | -0.076                            | 0.009                    | 0.098                              |  |
|                                          |               |                | landform          | 0.100               | 0.547      | 0.976                | 0.086                            | 0.475                   | 0.848                             | 0.115                             | 0.630                    | 1.124                              |  |
|                                          |               |                | soil moisture     | -0.202              | 0.286      | 0.846                | -0.020                           | 0.028                   | 0.082                             | -0.210                            | 0.296                    | 0.876                              |  |
|                                          |               |                | rock cover        | -0.574              | 0.048      | 0.697                | -10.120                          | 0.850                   | 12.275                            | -0.326                            | 0.027                    | 0.395                              |  |
|                                          |               |                | shrub cover       | -2.389              | -1.759     | -1.126               | -60.943                          | -44.879                 | -28.708                           | -0.937                            | -0.690                   | -0.441                             |  |
|                                          |               |                | bryophyte cover   | -0.896              | -0.364     | 0.074                | -17.932                          | -7.278                  | 1.478                             | -0.448                            | -0.182                   | 0.037                              |  |
|                                          |               |                | lichen cover      | -0.816              | -0.328     | 0.162                | -11.737                          | -4.712                  | 2.327                             | -0.567                            | -0.228                   | 0.112                              |  |
| vegetation height                        | -1.046        | -0.578         | -0.021            | -2.809              | -1.553     | -0.055               | -0.390                           | -0.215                  | -0.008                            |                                   |                          |                                    |  |
| soil - free-air T difference (winter)    | 50            | mean           | Intercept         | 6.127               | 6.615      | 7.075                |                                  |                         |                                   |                                   |                          |                                    |  |
|                                          |               |                | elevation         | 0.201               | 0.857      | 1.516                | 47.628                           | 203.517                 | 359.743                           | 0.085                             | 0.361                    | 0.639                              |  |
|                                          |               |                | solar radiation   | -0.977              | -0.413     | 0.123                | -0.063                           | -0.027                  | 0.008                             | -0.152                            | -0.064                   | 0.019                              |  |

| model response                                | circle radius | temp. variable | predictor           | post. 2.5% quantile | post. mean | post. 97.5% quantile | post. 2.5% quantile (backscaled) | post. mean (backscaled) | post. 97.5% quantile (backscaled) | post. 2.5% quantile (°C per unit) | post. mean (°C per unit) | post. 97.5% quantile (°C per unit) |  |
|-----------------------------------------------|---------------|----------------|---------------------|---------------------|------------|----------------------|----------------------------------|-------------------------|-----------------------------------|-----------------------------------|--------------------------|------------------------------------|--|
| soil - free-air T difference (winter) (cont.) | 50            | mean           | landform            | -0.542              | -0.052     | 0.464                | -0.471                           | -0.045                  | 0.403                             | -0.624                            | -0.060                   | 0.534                              |  |
|                                               |               |                | snow cover duration | 2.658               | 3.203      | 3.736                | 101.050                          | 121.757                 | 141.993                           | 0.699                             | 0.843                    | 0.983                              |  |
|                                               |               |                | rock cover          | -1.560              | -0.943     | -0.331               | -27.493                          | -16.611                 | -5.840                            | -0.885                            | -0.535                   | -0.188                             |  |
|                                               |               |                | shrub cover         | -1.582              | -0.917     | -0.255               | -40.348                          | -23.387                 | -6.511                            | -0.620                            | -0.359                   | -0.100                             |  |
|                                               |               |                | bryophyte cover     | -0.822              | -0.277     | 0.273                | -16.457                          | -5.548                  | 5.473                             | -0.411                            | -0.139                   | 0.137                              |  |
|                                               |               |                | lichen cover        | -1.408              | -0.823     | -0.218               | -20.246                          | -11.844                 | -3.143                            | -0.979                            | -0.573                   | -0.152                             |  |
|                                               |               |                | vegetation height   | -0.735              | -0.159     | 0.388                | -1.972                           | -0.427                  | 1.043                             | -0.274                            | -0.059                   | 0.145                              |  |
| soil - free-air T difference (winter)         | 50            | min            | Intercept           | 7.949               | 8.483      | 9.020                |                                  |                         |                                   |                                   |                          |                                    |  |
|                                               |               |                | elevation           | -0.112              | 0.563      | 1.287                | -26.615                          | 133.657                 | 305.507                           | -0.047                            | 0.237                    | 0.542                              |  |
|                                               |               |                | solar radiation     | -0.938              | -0.350     | 0.249                | -0.060                           | -0.023                  | 0.016                             | -0.145                            | -0.054                   | 0.039                              |  |
|                                               |               |                | landform            | -0.587              | -0.037     | 0.541                | -0.509                           | -0.032                  | 0.470                             | -0.675                            | -0.042                   | 0.623                              |  |
|                                               |               |                | snow cover duration | 2.994               | 3.630      | 4.207                | 113.807                          | 137.989                 | 159.901                           | 0.788                             | 0.955                    | 1.107                              |  |
|                                               |               |                | rock cover          | -1.651              | -0.982     | -0.306               | -29.085                          | -17.304                 | -5.398                            | -0.937                            | -0.557                   | -0.174                             |  |
|                                               |               |                | shrub cover         | -1.707              | -1.017     | -0.254               | -43.529                          | -25.949                 | -6.485                            | -0.669                            | -0.399                   | -0.100                             |  |
|                                               |               |                | bryophyte cover     | -0.858              | -0.274     | 0.317                | -17.178                          | -5.483                  | 6.339                             | -0.429                            | -0.137                   | 0.158                              |  |
|                                               |               |                | lichen cover        | -1.548              | -0.838     | -0.242               | -22.258                          | -12.052                 | -3.475                            | -1.076                            | -0.583                   | -0.168                             |  |
|                                               |               |                | vegetation height   | -0.849              | -0.204     | 0.413                | -2.280                           | -0.548                  | 1.107                             | -0.316                            | -0.076                   | 0.154                              |  |
| soil - free-air T difference (winter)         | 50            | max            | Intercept           | 4.367               | 4.829      | 5.295                |                                  |                         |                                   |                                   |                          |                                    |  |
|                                               |               |                | elevation           | 0.491               | 1.051      | 1.682                | 116.610                          | 249.336                 | 399.132                           | 0.207                             | 0.443                    | 0.709                              |  |
|                                               |               |                | solar radiation     | -0.919              | -0.422     | 0.094                | -0.059                           | -0.027                  | 0.006                             | -0.143                            | -0.065                   | 0.015                              |  |
|                                               |               |                | landform            | -0.552              | -0.063     | 0.389                | -0.479                           | -0.054                  | 0.338                             | -0.636                            | -0.072                   | 0.448                              |  |
|                                               |               |                | snow cover duration | 2.300               | 2.805      | 3.319                | 87.421                           | 106.630                 | 126.177                           | 0.605                             | 0.738                    | 0.873                              |  |
|                                               |               |                | rock cover          | -1.513              | -0.908     | -0.348               | -26.656                          | -16.004                 | -6.127                            | -0.858                            | -0.515                   | -0.197                             |  |
|                                               |               |                | shrub cover         | -1.498              | -0.856     | -0.244               | -38.212                          | -21.841                 | -6.230                            | -0.587                            | -0.336                   | -0.096                             |  |
|                                               |               |                | bryophyte cover     | -0.783              | -0.293     | 0.234                | -15.677                          | -5.862                  | 4.684                             | -0.391                            | -0.146                   | 0.117                              |  |
|                                               |               |                | lichen cover        | -1.434              | -0.837     | -0.315               | -20.623                          | -12.044                 | -4.529                            | -0.997                            | -0.582                   | -0.219                             |  |
|                                               |               |                | vegetation height   | -0.704              | -0.130     | 0.365                | -1.889                           | -0.348                  | 0.979                             | -0.262                            | -0.048                   | 0.136                              |  |

| model response                 | circle radius | temp. variable | predictor       | post. 2.5% quantile | post. mean | post. 97.5% quantile | post. 2.5% quantile (backscaled) | post. mean (backscaled) | post. 97.5% quantile (backscaled) | post. 2.5% quantile (°C per unit) | post. mean (°C per unit) | post. 97.5% quantile (°C per unit) |
|--------------------------------|---------------|----------------|-----------------|---------------------|------------|----------------------|----------------------------------|-------------------------|-----------------------------------|-----------------------------------|--------------------------|------------------------------------|
| canopy - free-air T difference | 50            | mean           | Intercept       | 1.457               | 1.548      | 1.631                |                                  |                         |                                   |                                   |                          |                                    |
|                                |               |                | elevation       | 0.168               | 0.305      | 0.421                | 39.834                           | 72.331                  | 99.998                            | 0.071                             | 0.128                    | 0.178                              |
|                                |               |                | slope angle     | -0.038              | 0.085      | 0.210                | -0.282                           | 0.633                   | 1.557                             | -0.005                            | 0.011                    | 0.028                              |
|                                |               |                | solar radiation | 0.075               | 0.172      | 0.278                | 0.004                            | 0.009                   | 0.015                             | 0.014                             | 0.032                    | 0.051                              |
|                                |               |                | landform        | -0.105              | -0.010     | 0.078                | -0.091                           | -0.009                  | 0.068                             | -0.121                            | -0.011                   | 0.090                              |
|                                |               |                | soil moisture   | -0.191              | -0.082     | 0.021                | -0.018                           | -0.008                  | 0.002                             | -0.198                            | -0.085                   | 0.022                              |
|                                |               |                | rock cover      | 0.047               | 0.188      | 0.315                | 0.836                            | 3.308                   | 5.551                             | 0.027                             | 0.107                    | 0.179                              |
|                                |               |                | shrub cover     | -0.098              | 0.032      | 0.168                | -2.503                           | 0.804                   | 4.289                             | -0.038                            | 0.012                    | 0.066                              |
|                                |               |                | bryophyte cover | -0.137              | -0.039     | 0.062                | -2.743                           | -0.789                  | 1.234                             | -0.069                            | -0.020                   | 0.031                              |
|                                |               |                | lichen cover    | -0.096              | 0.010      | 0.108                | -1.388                           | 0.150                   | 1.548                             | -0.067                            | 0.007                    | 0.075                              |
| vegetation height              | -0.024        | 0.083          | 0.195           | -0.063              | 0.222      | 0.523                | -0.009                           | 0.031                   | 0.073                             |                                   |                          |                                    |
| canopy - free-air T difference | 50            | min            | Intercept       | -0.696              | -0.585     | -0.482               |                                  |                         |                                   |                                   |                          |                                    |
|                                |               |                | elevation       | -0.018              | 0.131      | 0.286                | -4.378                           | 31.049                  | 67.822                            | -0.008                            | 0.055                    | 0.120                              |
|                                |               |                | slope angle     | 0.007               | 0.163      | 0.317                | 0.051                            | 1.210                   | 2.355                             | 0.001                             | 0.022                    | 0.043                              |
|                                |               |                | solar radiation | 0.058               | 0.179      | 0.306                | 0.003                            | 0.010                   | 0.017                             | 0.011                             | 0.033                    | 0.057                              |
|                                |               |                | landform        | -0.029              | 0.086      | 0.197                | -0.026                           | 0.074                   | 0.171                             | -0.034                            | 0.099                    | 0.227                              |
|                                |               |                | soil moisture   | -0.310              | -0.176     | -0.047               | -0.030                           | -0.017                  | -0.005                            | -0.322                            | -0.182                   | -0.049                             |
|                                |               |                | rock cover      | -0.061              | 0.098      | 0.263                | -1.082                           | 1.735                   | 4.642                             | -0.035                            | 0.056                    | 0.149                              |
|                                |               |                | shrub cover     | -0.406              | -0.234     | -0.071               | -10.348                          | -5.972                  | -1.820                            | -0.159                            | -0.092                   | -0.028                             |
|                                |               |                | bryophyte cover | -0.133              | -0.008     | 0.117                | -2.662                           | -0.151                  | 2.342                             | -0.066                            | -0.004                   | 0.058                              |
|                                |               |                | lichen cover    | -0.081              | 0.049      | 0.185                | -1.171                           | 0.703                   | 2.656                             | -0.057                            | 0.034                    | 0.128                              |
| vegetation height              | -0.308        | -0.167         | -0.040          | -0.827              | -0.448     | -0.107               | -0.115                           | -0.062                  | -0.015                            |                                   |                          |                                    |
| canopy - free-air T difference | 50            | max            | Intercept       | 3.991               | 4.179      | 4.364                |                                  |                         |                                   |                                   |                          |                                    |
|                                |               |                | elevation       | 0.096               | 0.368      | 0.630                | 22.683                           | 87.317                  | 149.440                           | 0.040                             | 0.155                    | 0.265                              |
|                                |               |                | slope angle     | 0.058               | 0.315      | 0.557                | 0.434                            | 2.341                   | 4.137                             | 0.008                             | 0.042                    | 0.075                              |
|                                |               |                | solar radiation | -0.129              | 0.062      | 0.284                | -0.007                           | 0.003                   | 0.015                             | -0.024                            | 0.011                    | 0.053                              |
|                                |               |                | landform        | -0.295              | -0.111     | 0.073                | -0.257                           | -0.097                  | 0.063                             | -0.340                            | -0.128                   | 0.084                              |
|                                |               |                | soil moisture   | -0.336              | -0.115     | 0.113                | -0.032                           | -0.011                  | 0.011                             | -0.348                            | -0.119                   | 0.117                              |
|                                |               |                | rock cover      | -0.037              | 0.216      | 0.494                | -0.648                           | 3.810                   | 8.697                             | -0.021                            | 0.123                    | 0.280                              |
|                                |               |                | shrub cover     | 0.007               | 0.289      | 0.574                | 0.167                            | 7.363                   | 14.639                            | 0.003                             | 0.113                    | 0.225                              |

| model response                                | circle radius | temp. variable | predictor         | post. 2.5% quantile | post. mean | post. 97.5% quantile | post. 2.5% quantile (backscaled) | post. mean (backscaled) | post. 97.5% quantile (backscaled) | post. 2.5% quantile (°C per unit) | post. mean (°C per unit) | post. 97.5% quantile (°C per unit) |  |
|-----------------------------------------------|---------------|----------------|-------------------|---------------------|------------|----------------------|----------------------------------|-------------------------|-----------------------------------|-----------------------------------|--------------------------|------------------------------------|--|
| canopy - free-air T difference (cont.)        | 50            | max            | bryophyte cover   | -0.330              | -0.120     | 0.090                | -6.599                           | -2.409                  | 1.804                             | -0.165                            | -0.060                   | 0.045                              |  |
|                                               |               |                | lichen cover      | -0.314              | -0.110     | 0.104                | -4.510                           | -1.585                  | 1.502                             | -0.218                            | -0.077                   | 0.073                              |  |
|                                               |               |                | vegetation height | 0.254               | 0.479      | 0.702                | 0.682                            | 1.287                   | 1.883                             | 0.095                             | 0.179                    | 0.261                              |  |
| soil - free-air T difference (growing season) | 50            | mean           | Intercept         | 1.789               | 2.055      | 2.312                |                                  |                         |                                   |                                   |                          |                                    |  |
|                                               |               |                | elevation         | 0.314               | 0.693      | 1.069                | 74.579                           | 164.422                 | 253.658                           | 0.132                             | 0.292                    | 0.450                              |  |
|                                               |               |                | slope angle       | -0.049              | 0.302      | 0.659                | -0.367                           | 2.240                   | 4.897                             | -0.007                            | 0.041                    | 0.089                              |  |
|                                               |               |                | solar radiation   | 0.140               | 0.441      | 0.728                | 0.008                            | 0.024                   | 0.039                             | 0.026                             | 0.082                    | 0.134                              |  |
|                                               |               |                | landform          | -0.060              | 0.207      | 0.478                | -0.052                           | 0.179                   | 0.415                             | -0.069                            | 0.238                    | 0.551                              |  |
|                                               |               |                | soil moisture     | -0.347              | -0.029     | 0.309                | -0.033                           | -0.003                  | 0.030                             | -0.359                            | -0.030                   | 0.320                              |  |
|                                               |               |                | rock cover        | -0.188              | 0.201      | 0.605                | -3.312                           | 3.546                   | 10.666                            | -0.107                            | 0.114                    | 0.344                              |  |
|                                               |               |                | shrub cover       | -1.018              | -0.622     | -0.222               | -25.964                          | -15.854                 | -5.652                            | -0.399                            | -0.244                   | -0.087                             |  |
|                                               |               |                | bryophyte cover   | -0.996              | -0.693     | -0.388               | -19.927                          | -13.874                 | -7.773                            | -0.498                            | -0.346                   | -0.194                             |  |
|                                               |               |                | lichen cover      | -0.568              | -0.271     | 0.033                | -8.173                           | -3.898                  | 0.472                             | -0.395                            | -0.188                   | 0.023                              |  |
| vegetation height                             | -0.803        | -0.477         | -0.173            | -2.155              | -1.282     | -0.464               | -0.299                           | -0.178                  | -0.064                            |                                   |                          |                                    |  |
| soil - free-air T difference (growing season) | 50            | min            | Intercept         | 2.481               | 2.732      | 2.990                |                                  |                         |                                   |                                   |                          |                                    |  |
|                                               |               |                | elevation         | -0.067              | 0.325      | 0.680                | -15.835                          | 77.229                  | 161.458                           | -0.028                            | 0.137                    | 0.287                              |  |
|                                               |               |                | slope angle       | -0.117              | 0.209      | 0.594                | -0.868                           | 1.551                   | 4.414                             | -0.016                            | 0.028                    | 0.080                              |  |
|                                               |               |                | solar radiation   | -0.053              | 0.244      | 0.525                | -0.003                           | 0.013                   | 0.028                             | -0.010                            | 0.045                    | 0.097                              |  |
|                                               |               |                | landform          | -0.114              | 0.123      | 0.411                | -0.099                           | 0.107                   | 0.357                             | -0.132                            | 0.142                    | 0.473                              |  |
|                                               |               |                | soil moisture     | -0.235              | 0.060      | 0.376                | -0.023                           | 0.006                   | 0.036                             | -0.244                            | 0.062                    | 0.389                              |  |
|                                               |               |                | rock cover        | -0.201              | 0.221      | 0.593                | -3.547                           | 3.898                   | 10.450                            | -0.114                            | 0.126                    | 0.337                              |  |
|                                               |               |                | shrub cover       | -0.603              | -0.209     | 0.195                | -15.389                          | -5.325                  | 4.970                             | -0.237                            | -0.082                   | 0.076                              |  |
|                                               |               |                | bryophyte cover   | -0.900              | -0.585     | -0.308               | -18.003                          | -11.714                 | -6.159                            | -0.450                            | -0.293                   | -0.154                             |  |
|                                               |               |                | lichen cover      | -0.320              | -0.037     | 0.276                | -4.600                           | -0.538                  | 3.967                             | -0.222                            | -0.026                   | 0.192                              |  |
| vegetation height                             | -0.814        | -0.480         | -0.170            | -2.185              | -1.289     | -0.458               | -0.303                           | -0.179                  | -0.064                            |                                   |                          |                                    |  |
| soil - free-air T difference (growing season) | 50            | max            | Intercept         | 1.622               | 2.005      | 2.367                |                                  |                         |                                   |                                   |                          |                                    |  |
|                                               |               |                | elevation         | 0.514               | 1.079      | 1.556                | 122.031                          | 256.129                 | 369.255                           | 0.217                             | 0.455                    | 0.655                              |  |
|                                               |               |                | slope angle       | -0.063              | 0.433      | 0.919                | -0.469                           | 3.217                   | 6.824                             | -0.009                            | 0.058                    | 0.124                              |  |

| model response                                        | circle radius | temp. variable | predictor         | post. 2.5% quantile | post. mean | post. 97.5% quantile | post. 2.5% quantile (backscaled) | post. mean (backscaled) | post. 97.5% quantile (backscaled) | post. 2.5% quantile (°C per unit) | post. mean (°C per unit) | post. 97.5% quantile (°C per unit) |
|-------------------------------------------------------|---------------|----------------|-------------------|---------------------|------------|----------------------|----------------------------------|-------------------------|-----------------------------------|-----------------------------------|--------------------------|------------------------------------|
| soil - free-air T difference (growing season) (cont.) | 50            | max            | solar radiation   | 0.130               | 0.512      | 0.935                | 0.007                            | 0.028                   | 0.051                             | 0.024                             | 0.095                    | 0.173                              |
|                                                       |               |                | landform          | -0.053              | 0.324      | 0.691                | -0.046                           | 0.282                   | 0.600                             | -0.061                            | 0.373                    | 0.796                              |
|                                                       |               |                | soil moisture     | -0.619              | -0.182     | 0.268                | -0.060                           | -0.018                  | 0.026                             | -0.641                            | -0.188                   | 0.278                              |
|                                                       |               |                | rock cover        | -0.528              | 0.041      | 0.598                | -9.304                           | 0.714                   | 10.537                            | -0.300                            | 0.023                    | 0.339                              |
|                                                       |               |                | shrub cover       | -1.664              | -1.081     | -0.537               | -42.442                          | -27.574                 | -13.709                           | -0.652                            | -0.424                   | -0.211                             |
|                                                       |               |                | bryophyte cover   | -1.292              | -0.877     | -0.465               | -25.846                          | -17.549                 | -9.300                            | -0.645                            | -0.438                   | -0.232                             |
|                                                       |               |                | lichen cover      | -1.048              | -0.619     | -0.190               | -15.069                          | -8.897                  | -2.738                            | -0.728                            | -0.430                   | -0.132                             |
|                                                       |               |                | vegetation height | -0.997              | -0.544     | -0.094               | -2.677                           | -1.459                  | -0.253                            | -0.371                            | -0.202                   | -0.035                             |
| soil - canopy T difference                            | 200           | mean           | Intercept         | 0.234               | 0.487      | 0.728                |                                  |                         |                                   |                                   |                          |                                    |
|                                                       |               |                | elevation         | -0.028              | 0.311      | 0.641                | -6.715                           | 73.781                  | 152.023                           | -0.012                            | 0.131                    | 0.270                              |
|                                                       |               |                | slope angle       | -0.074              | 0.293      | 0.638                | -0.547                           | 2.174                   | 4.736                             | -0.010                            | 0.039                    | 0.086                              |
|                                                       |               |                | solar radiation   | 0.091               | 0.373      | 0.675                | 0.005                            | 0.020                   | 0.037                             | 0.017                             | 0.069                    | 0.125                              |
|                                                       |               |                | landform          | -0.096              | 0.181      | 0.418                | -0.083                           | 0.157                   | 0.363                             | -0.110                            | 0.209                    | 0.481                              |
|                                                       |               |                | soil moisture     | -0.167              | 0.132      | 0.447                | -0.016                           | 0.013                   | 0.043                             | -0.173                            | 0.137                    | 0.463                              |
|                                                       |               |                | rock cover        | -0.432              | -0.125     | 0.214                | -8.331                           | -2.412                  | 4.124                             | -0.225                            | -0.065                   | 0.111                              |
|                                                       |               |                | shrub cover       | -1.344              | -0.873     | -0.456               | -32.664                          | -21.214                 | -11.074                           | -0.553                            | -0.359                   | -0.188                             |
|                                                       |               |                | bryophyte cover   | -0.878              | -0.585     | -0.255               | -13.164                          | -8.774                  | -3.826                            | -0.586                            | -0.391                   | -0.170                             |
|                                                       |               |                | lichen cover      | -0.738              | -0.446     | -0.177               | -8.506                           | -5.140                  | -2.037                            | -0.640                            | -0.387                   | -0.153                             |
|                                                       |               |                | vegetation height | -0.738              | -0.372     | -0.013               | -2.318                           | -1.168                  | -0.041                            | -0.235                            | -0.119                   | -0.004                             |
| soil - canopy T difference                            | 200           | min            | Intercept         | -7.611              | -7.366     | -7.117               |                                  |                         |                                   |                                   |                          |                                    |
|                                                       |               |                | elevation         | -0.130              | 0.214      | 0.548                | -30.959                          | 50.888                  | 130.029                           | -0.055                            | 0.090                    | 0.231                              |
|                                                       |               |                | slope angle       | -0.447              | -0.111     | 0.232                | -3.318                           | -0.828                  | 1.725                             | -0.060                            | -0.015                   | 0.031                              |
|                                                       |               |                | solar radiation   | 0.068               | 0.337      | 0.620                | 0.004                            | 0.018                   | 0.034                             | 0.013                             | 0.062                    | 0.115                              |
|                                                       |               |                | landform          | -0.146              | 0.121      | 0.365                | -0.126                           | 0.105                   | 0.317                             | -0.168                            | 0.139                    | 0.421                              |
|                                                       |               |                | soil moisture     | 0.081               | 0.376      | 0.690                | 0.008                            | 0.036                   | 0.067                             | 0.084                             | 0.389                    | 0.714                              |
|                                                       |               |                | rock cover        | -0.254              | 0.067      | 0.377                | -4.894                           | 1.295                   | 7.264                             | -0.132                            | 0.035                    | 0.196                              |
|                                                       |               |                | shrub cover       | -0.953              | -0.531     | -0.107               | -23.157                          | -12.910                 | -2.597                            | -0.392                            | -0.219                   | -0.044                             |
|                                                       |               |                | bryophyte cover   | -0.802              | -0.530     | -0.222               | -12.025                          | -7.940                  | -3.323                            | -0.535                            | -0.353                   | -0.148                             |

| model response                     | circle radius | temp. variable | predictor         | post. 2.5% quantile | post. mean | post. 97.5% quantile | post. 2.5% quantile (backscaled) | post. mean (backscaled) | post. 97.5% quantile (backscaled) | post. 2.5% quantile (°C per unit) | post. mean (°C per unit) | post. 97.5% quantile (°C per unit) |  |
|------------------------------------|---------------|----------------|-------------------|---------------------|------------|----------------------|----------------------------------|-------------------------|-----------------------------------|-----------------------------------|--------------------------|------------------------------------|--|
| soil - canopy T difference (cont.) | 200           | min            | lichen cover      | -0.461              | -0.182     | 0.084                | -5.314                           | -2.098                  | 0.965                             | -0.400                            | -0.158                   | 0.073                              |  |
|                                    |               |                | vegetation height | -1.188              | -0.838     | -0.495               | -3.728                           | -2.629                  | -1.553                            | -0.378                            | -0.267                   | -0.158                             |  |
| soil - canopy T difference         | 200           | max            | Intercept         | -2.595              | -2.181     | -1.825               |                                  |                         |                                   |                                   |                          |                                    |  |
|                                    |               |                | elevation         | 0.107               | 0.648      | 1.178                | 25.496                           | 153.868                 | 279.619                           | 0.045                             | 0.273                    | 0.496                              |  |
|                                    |               |                | slope angle       | -0.426              | 0.143      | 0.682                | -3.164                           | 1.062                   | 5.069                             | -0.057                            | 0.019                    | 0.092                              |  |
|                                    |               |                | solar radiation   | 0.247               | 0.678      | 1.146                | 0.013                            | 0.037                   | 0.062                             | 0.046                             | 0.125                    | 0.212                              |  |
|                                    |               |                | landform          | 0.007               | 0.425      | 0.799                | 0.006                            | 0.369                   | 0.694                             | 0.008                             | 0.490                    | 0.920                              |  |
|                                    |               |                | soil moisture     | -0.451              | 0.015      | 0.496                | -0.044                           | 0.001                   | 0.048                             | -0.467                            | 0.016                    | 0.514                              |  |
|                                    |               |                | rock cover        | -0.798              | -0.292     | 0.247                | -15.374                          | -5.624                  | 4.766                             | -0.414                            | -0.152                   | 0.128                              |  |
|                                    |               |                | shrub cover       | -2.116              | -1.463     | -0.789               | -51.405                          | -35.537                 | -19.166                           | -0.871                            | -0.602                   | -0.325                             |  |
|                                    |               |                | bryophyte cover   | -1.108              | -0.634     | -0.185               | -16.600                          | -9.505                  | -2.769                            | -0.739                            | -0.423                   | -0.123                             |  |
|                                    |               |                | lichen cover      | -1.195              | -0.731     | -0.293               | -13.774                          | -8.428                  | -3.378                            | -1.037                            | -0.634                   | -0.254                             |  |
| vegetation height                  | -1.401        | -0.864         | -0.306            | -4.397              | -2.711     | -0.962               | -0.446                           | -0.275                  | -0.098                            |                                   |                          |                                    |  |
| soil - canopy T difference         | 564           | mean           | Intercept         | 0.221               | 0.498      | 0.779                |                                  |                         |                                   |                                   |                          |                                    |  |
|                                    |               |                | elevation         | 0.034               | 0.411      | 0.795                | 8.136                            | 97.523                  | 188.762                           | 0.014                             | 0.173                    | 0.335                              |  |
|                                    |               |                | slope angle       | -0.275              | 0.109      | 0.483                | -2.046                           | 0.810                   | 3.590                             | -0.037                            | 0.015                    | 0.065                              |  |
|                                    |               |                | solar radiation   | 0.049               | 0.391      | 0.709                | 0.003                            | 0.021                   | 0.038                             | 0.009                             | 0.072                    | 0.131                              |  |
|                                    |               |                | landform          | -0.018              | 0.258      | 0.559                | -0.016                           | 0.224                   | 0.485                             | -0.021                            | 0.297                    | 0.644                              |  |
|                                    |               |                | soil moisture     | -0.236              | 0.115      | 0.437                | -0.023                           | 0.011                   | 0.042                             | -0.244                            | 0.119                    | 0.452                              |  |
|                                    |               |                | rock cover        | -0.314              | 0.045      | 0.414                | -6.344                           | 0.913                   | 8.372                             | -0.155                            | 0.022                    | 0.204                              |  |
|                                    |               |                | shrub cover       | -0.991              | -0.516     | -0.001               | -23.804                          | -12.386                 | -0.032                            | -0.413                            | -0.215                   | -0.001                             |  |
|                                    |               |                | bryophyte cover   | -1.056              | -0.741     | -0.378               | -16.200                          | -11.376                 | -5.805                            | -0.688                            | -0.483                   | -0.247                             |  |
|                                    |               |                | lichen cover      | -0.767              | -0.432     | -0.108               | -9.862                           | -5.555                  | -1.393                            | -0.597                            | -0.336                   | -0.084                             |  |
| vegetation height                  | -0.769        | -0.399         | -0.001            | -2.572              | -1.334     | -0.005               | -0.230                           | -0.119                  | 0.000                             |                                   |                          |                                    |  |
| soil - canopy T difference         | 564           | min            | Intercept         | -7.647              | -7.365     | -7.100               |                                  |                         |                                   |                                   |                          |                                    |  |
|                                    |               |                | elevation         | -0.069              | 0.302      | 0.668                | -16.481                          | 71.711                  | 158.611                           | -0.029                            | 0.127                    | 0.282                              |  |
|                                    |               |                | slope angle       | -0.690              | -0.317     | 0.039                | -5.127                           | -2.354                  | 0.290                             | -0.093                            | -0.043                   | 0.005                              |  |
|                                    |               |                | solar radiation   | 0.086               | 0.418      | 0.730                | 0.005                            | 0.023                   | 0.040                             | 0.016                             | 0.077                    | 0.135                              |  |
|                                    |               |                | landform          | -0.025              | 0.260      | 0.550                | -0.021                           | 0.226                   | 0.478                             | -0.028                            | 0.300                    | 0.634                              |  |
|                                    |               |                | soil moisture     | 0.086               | 0.406      | 0.733                | 0.008                            | 0.039                   | 0.071                             | 0.089                             | 0.420                    | 0.759                              |  |
|                                    |               |                | rock cover        | -0.130              | 0.216      | 0.589                | -2.622                           | 4.377                   | 11.928                            | -0.064                            | 0.107                    | 0.291                              |  |

| model response                     | circle radius | temp. variable | predictor         | post. 2.5% quantile | post. mean | post. 97.5% quantile | post. 2.5% quantile (backscaled) | post. mean (backscaled) | post. 97.5% quantile (backscaled) | post. 2.5% quantile (°C per unit) | post. mean (°C per unit) | post. 97.5% quantile (°C per unit) |
|------------------------------------|---------------|----------------|-------------------|---------------------|------------|----------------------|----------------------------------|-------------------------|-----------------------------------|-----------------------------------|--------------------------|------------------------------------|
| soil - canopy T difference (cont.) | 564           | min            | shrub cover       | -0.604              | -0.110     | 0.380                | -14.508                          | -2.643                  | 9.131                             | -0.252                            | -0.046                   | 0.158                              |
|                                    |               |                | bryophyte cover   | -0.955              | -0.640     | -0.320               | -14.658                          | -9.817                  | -4.917                            | -0.623                            | -0.417                   | -0.209                             |
|                                    |               |                | lichen cover      | -0.540              | -0.219     | 0.106                | -6.947                           | -2.816                  | 1.357                             | -0.420                            | -0.170                   | 0.082                              |
|                                    |               |                | vegetation height | -1.320              | -0.943     | -0.568               | -4.414                           | -3.155                  | -1.899                            | -0.395                            | -0.282                   | -0.170                             |
| soil - canopy T difference         | 564           | max            | Intercept         | -2.598              | -2.157     | -1.723               |                                  |                         |                                   |                                   |                          |                                    |
|                                    |               |                | elevation         | 0.129               | 0.737      | 1.367                | 30.598                           | 174.886                 | 324.492                           | 0.054                             | 0.310                    | 0.576                              |
|                                    |               |                | slope angle       | -0.674              | -0.065     | 0.592                | -5.004                           | -0.484                  | 4.397                             | -0.091                            | -0.009                   | 0.080                              |
|                                    |               |                | solar radiation   | 0.140               | 0.650      | 1.219                | 0.008                            | 0.035                   | 0.066                             | 0.026                             | 0.120                    | 0.225                              |
|                                    |               |                | landform          | 0.101               | 0.576      | 1.108                | 0.088                            | 0.500                   | 0.962                             | 0.116                             | 0.663                    | 1.276                              |
|                                    |               |                | soil moisture     | -0.571              | -0.014     | 0.576                | -0.055                           | -0.001                  | 0.056                             | -0.591                            | -0.014                   | 0.596                              |
|                                    |               |                | rock cover        | -0.622              | -0.033     | 0.554                | -12.595                          | -0.670                  | 11.215                            | -0.308                            | -0.016                   | 0.274                              |
|                                    |               |                | shrub cover       | -2.003              | -1.114     | -0.350               | -48.115                          | -26.748                 | -8.401                            | -0.834                            | -0.464                   | -0.146                             |
|                                    |               |                | bryophyte cover   | -1.231              | -0.705     | -0.113               | -18.890                          | -10.812                 | -1.738                            | -0.802                            | -0.459                   | -0.074                             |
|                                    |               |                | lichen cover      | -1.258              | -0.714     | -0.182               | -16.172                          | -9.178                  | -2.337                            | -0.978                            | -0.555                   | -0.141                             |
|                                    |               |                | vegetation height | -1.357              | -0.737     | -0.140               | -4.540                           | -2.466                  | -0.470                            | -0.406                            | -0.220                   | -0.042                             |



**Table S7:** Predicted threshold cover percentages for switch from warmer to colder soils compared to canopy-level mean temperatures during the growing season. See also Figure 4 a,d,g for graphed relationships.

| sample plot size (radius) | cover variable | threshold cover % |
|---------------------------|----------------|-------------------|
| small (0.50m)             | shrubs         | 50.99             |
| small (0.50m)             | bryophytes     | 29.06             |
| medium (2.00m)            | shrubs         | 44.87             |
| medium (2.00m)            | bryophytes     | 23.21             |
| large (5.64m)             | shrubs         | 56.44             |
| large (5.64m)             | bryophytes     | 22.50             |

**Table S8:** Pearson correlation coefficients for shrub and bryophyte cover and average vegetation height across sample plot sizes.

| variable                                  | bryophyte cover<br>(r = 0.5 m) | bryophyte cover<br>(r = 2.0 m) | bryophyte cover<br>(r = 5.64 m) | shrubs cover<br>(r = 0.5 m) | shrubs cover<br>(r = 2.0 m) | shrubs cover<br>(r = 5.64 m) | average vegetation height<br>(r = 0.5 m) | average vegetation height<br>(r = 2.0 m) | average vegetation height<br>(r = 5.64 m) |
|-------------------------------------------|--------------------------------|--------------------------------|---------------------------------|-----------------------------|-----------------------------|------------------------------|------------------------------------------|------------------------------------------|-------------------------------------------|
| bryophyte cover<br>(r = 0.5 m)            | 1.00                           | 0.84                           | 0.78                            |                             |                             |                              |                                          |                                          |                                           |
| bryophyte cover<br>(r = 2.0 m)            | 0.84                           | 1.00                           | 0.89                            |                             |                             |                              |                                          |                                          |                                           |
| bryophyte cover<br>(r = 5.64 m)           | 0.78                           | 0.89                           | 1.00                            |                             |                             |                              |                                          |                                          |                                           |
| shrubs cover<br>(r = 0.5 m)               |                                |                                |                                 | 1.00                        | 0.86                        | 0.79                         |                                          |                                          |                                           |
| shrubs cover<br>(r = 2.0 m)               |                                |                                |                                 | 0.86                        | 1.00                        | 0.89                         |                                          |                                          |                                           |
| shrubs cover<br>(r = 5.64 m)              |                                |                                |                                 | 0.79                        | 0.89                        | 1.00                         |                                          |                                          |                                           |
| average vegetation height<br>(r = 0.5 m)  |                                |                                |                                 |                             |                             |                              | 1.00                                     | 0.90                                     | 0.63                                      |
| average vegetation height<br>(r = 2.0 m)  |                                |                                |                                 |                             |                             |                              | 0.90                                     | 1.00                                     | 0.83                                      |
| average vegetation height<br>(r = 5.64 m) |                                |                                |                                 |                             |                             |                              | 0.63                                     | 0.83                                     | 1.00                                      |
